# Supplementary material
Source: publisher figshare collection journal article supplement (https://gsajournals.figshare.com/articles/dataset/_/19918309)

**Supplementary Figure S5.** Genome-wide association study (GWAS), expression quantitative trait loci (eQTL), and eQTL and GWAS CAusal Variants Identification in Associated Regions (eCAVIAR) results of 22 gene-phenotype pairs. A, Three local Manhattan plots ( $\pm 100$  kb) showing the GWAS, eQTL, and eCAVIAR results of each gene-phenotype pair. Each point represents a SNP with its  $-\log_{10} P$ -value (y-axis) from a mixed linear model analysis in GWAS or eQTL, or the CLPP value from eCAVIAR, plotted as a function of physical position (Mb, B73 RefGen\_v4) on x-axis. The blue rectangle represents the physical position of the gene. The red dot represents the SNP with the highest CLPP value, and the orange dot represents the other SNPs with a CLPP value passing the  $\geq 0.01$  threshold. B, Pairwise linkage disequilibrium (LD,  $r^2$ ) of all SNPs included in A, with the LD between SNPs with CLPP values  $\geq 0.01$  indicated in the bottom left.

GWAS, eQTL and eCAVIAR results at *arodeH2* (Zm00001d014734) for  $\gamma$ T3

A

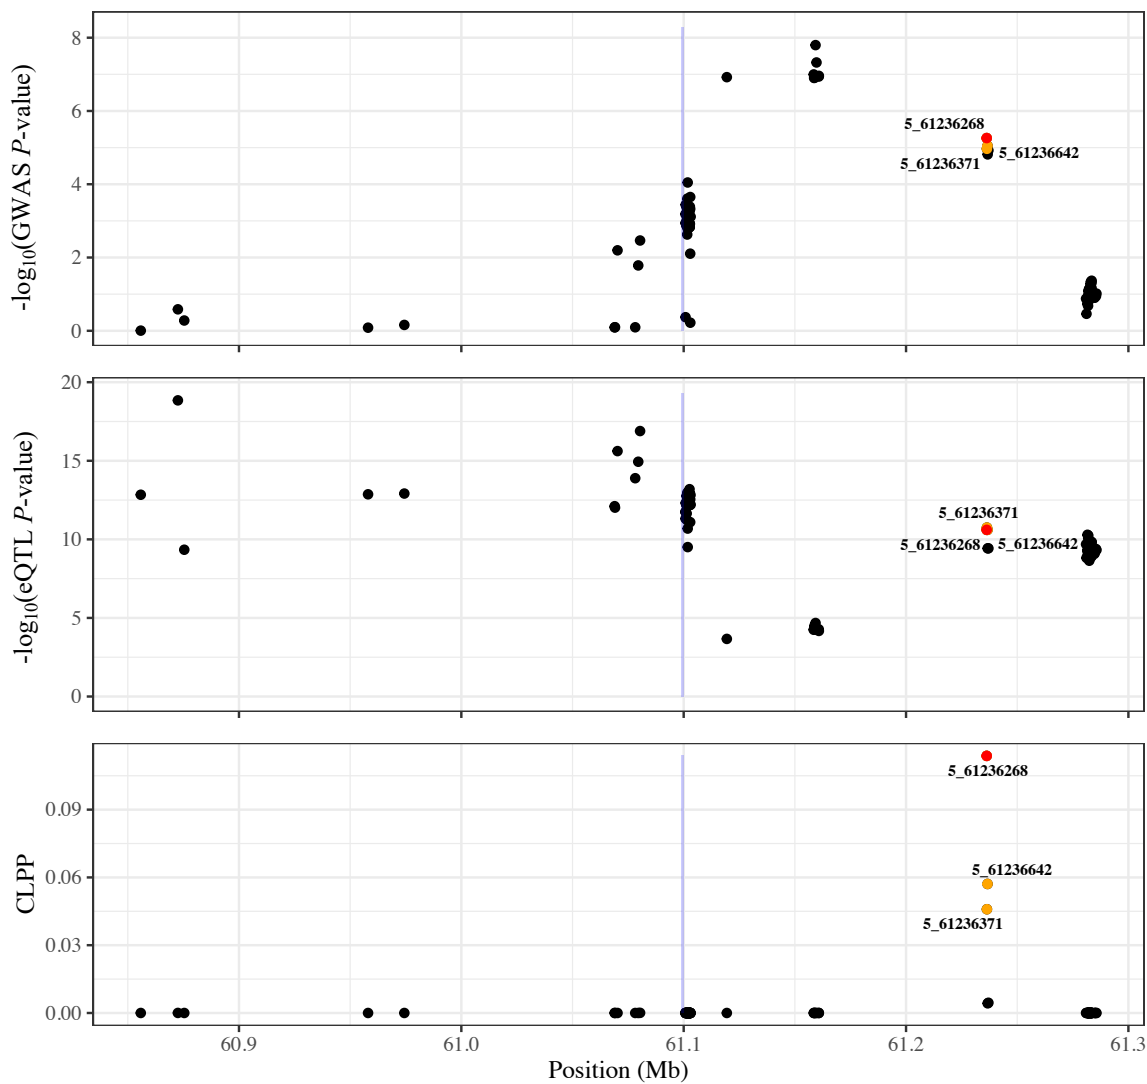

B

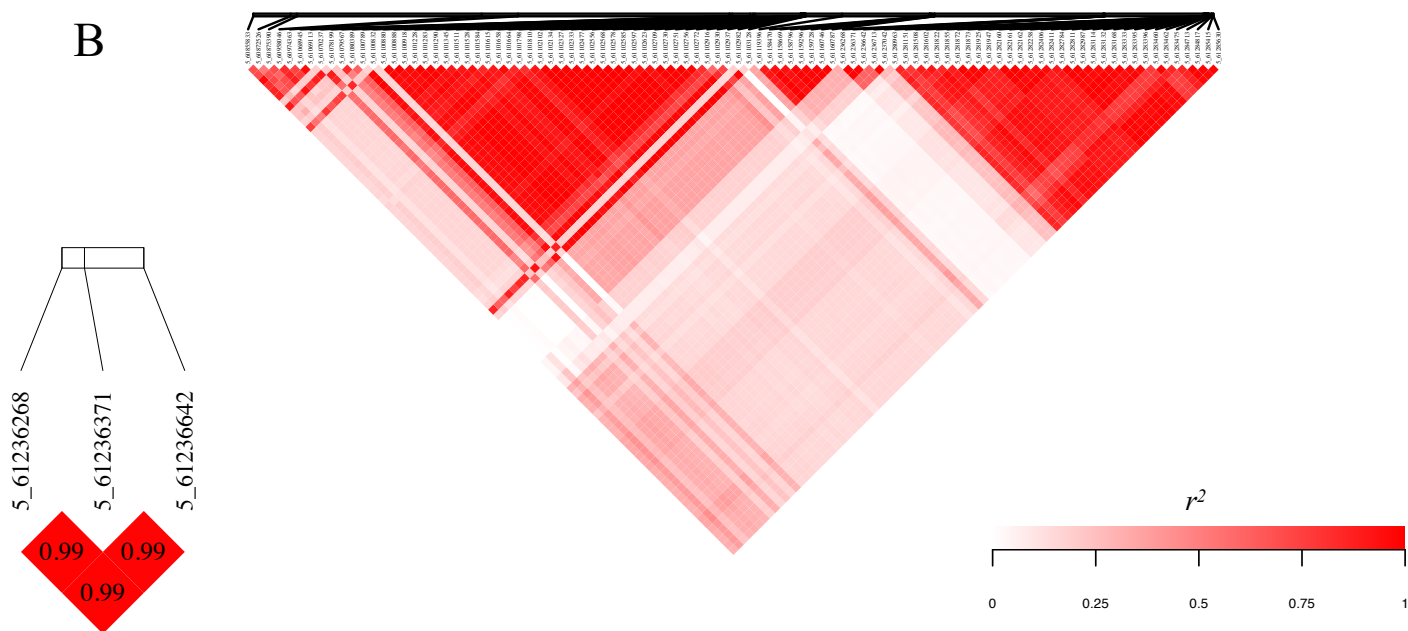



# GWAS, eQTL and eCAVIAR results at *arodeH2* (Zm00001d014734) for $\Sigma T3$

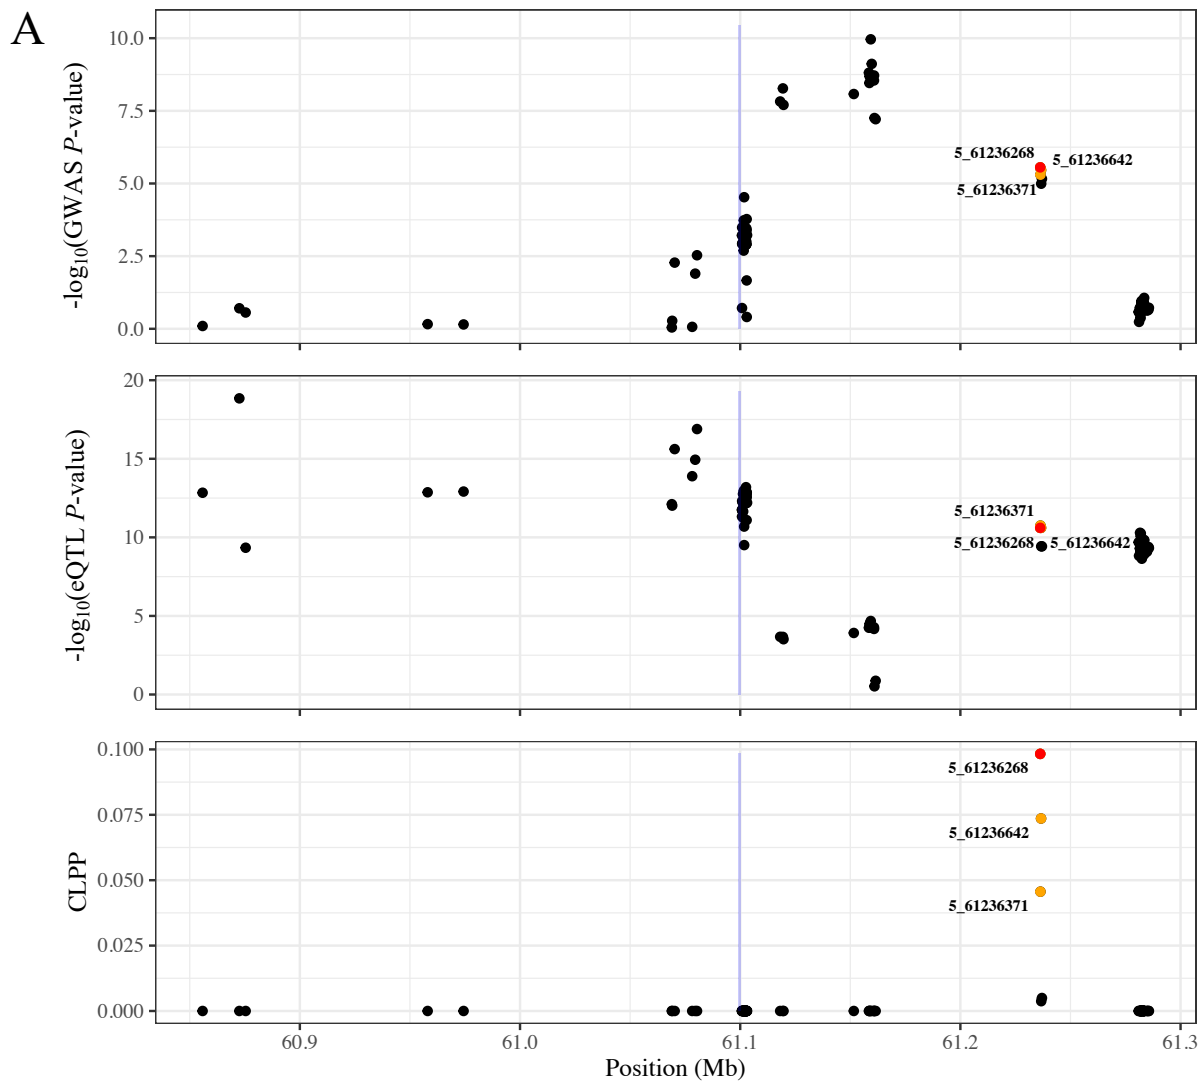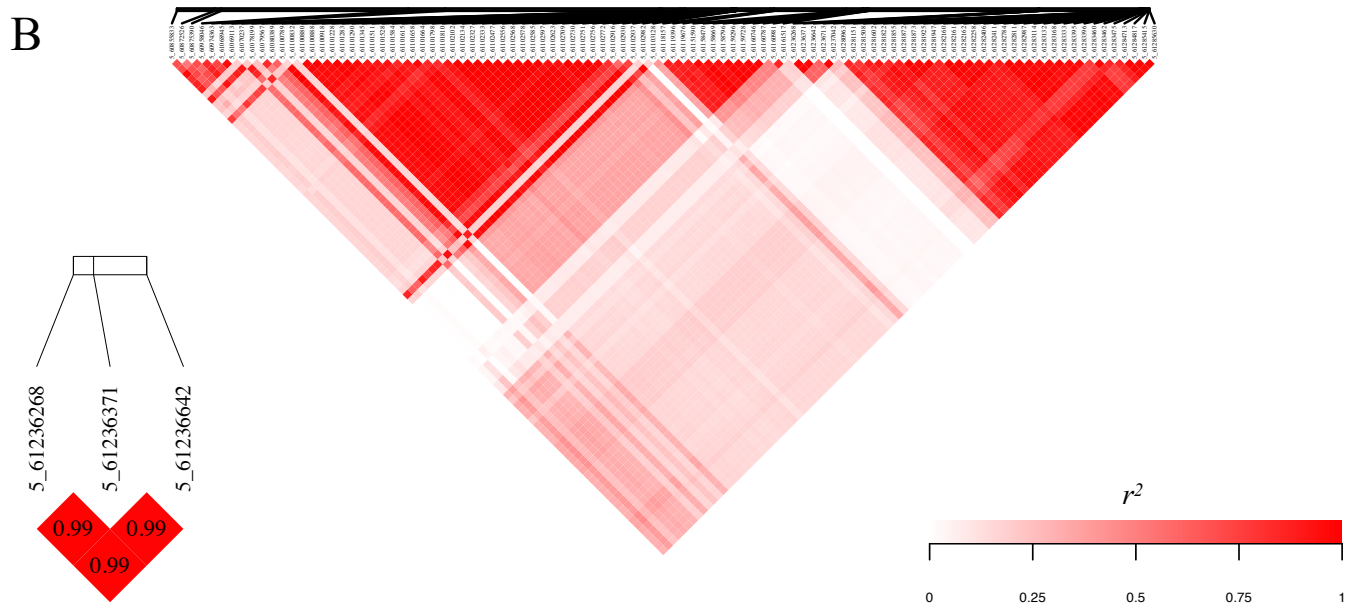

# GWAS, eQTL and eCAVIAR results at *hggt1* for $\alpha$ T3

A

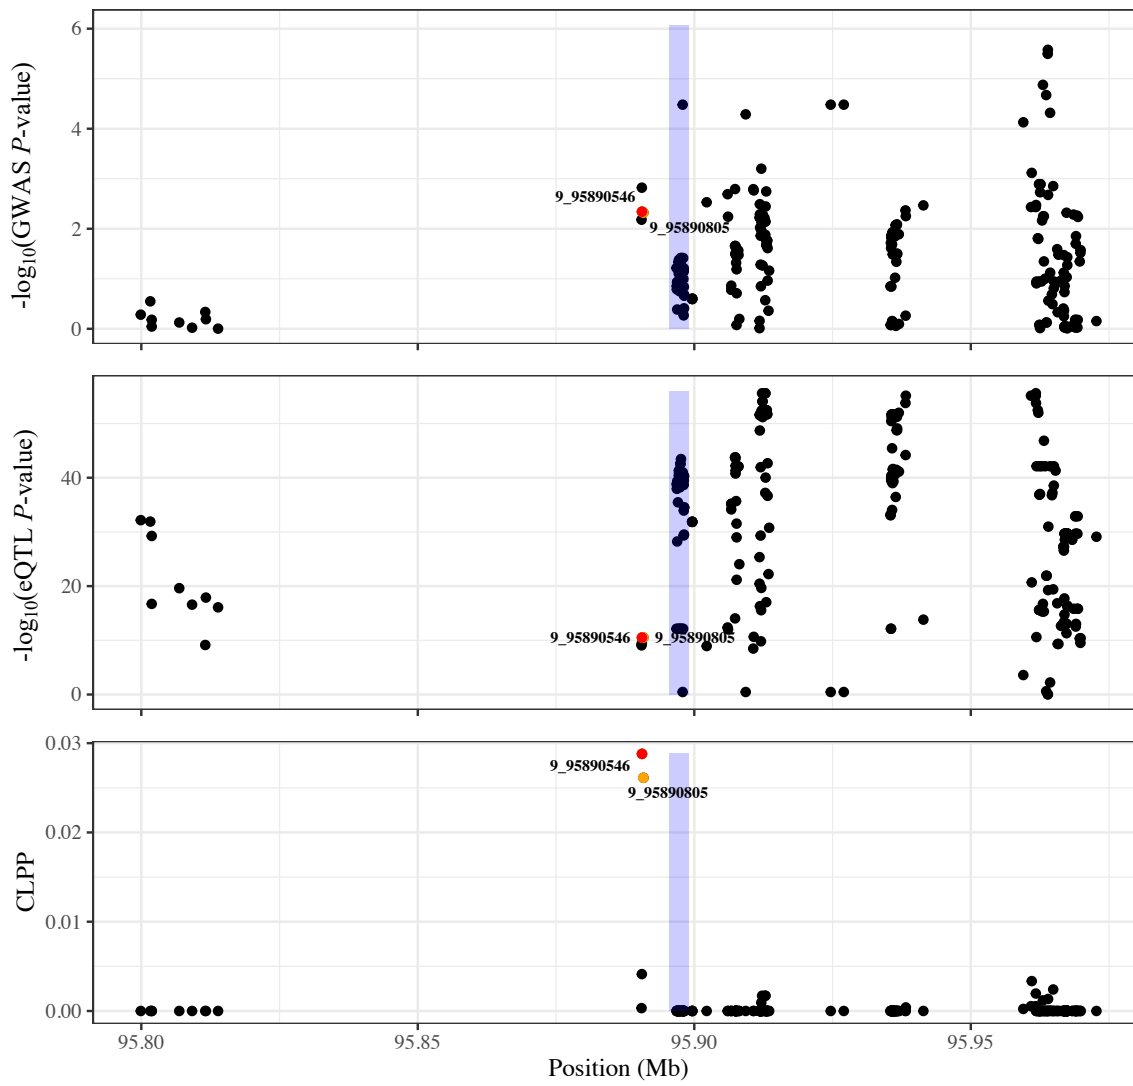

B

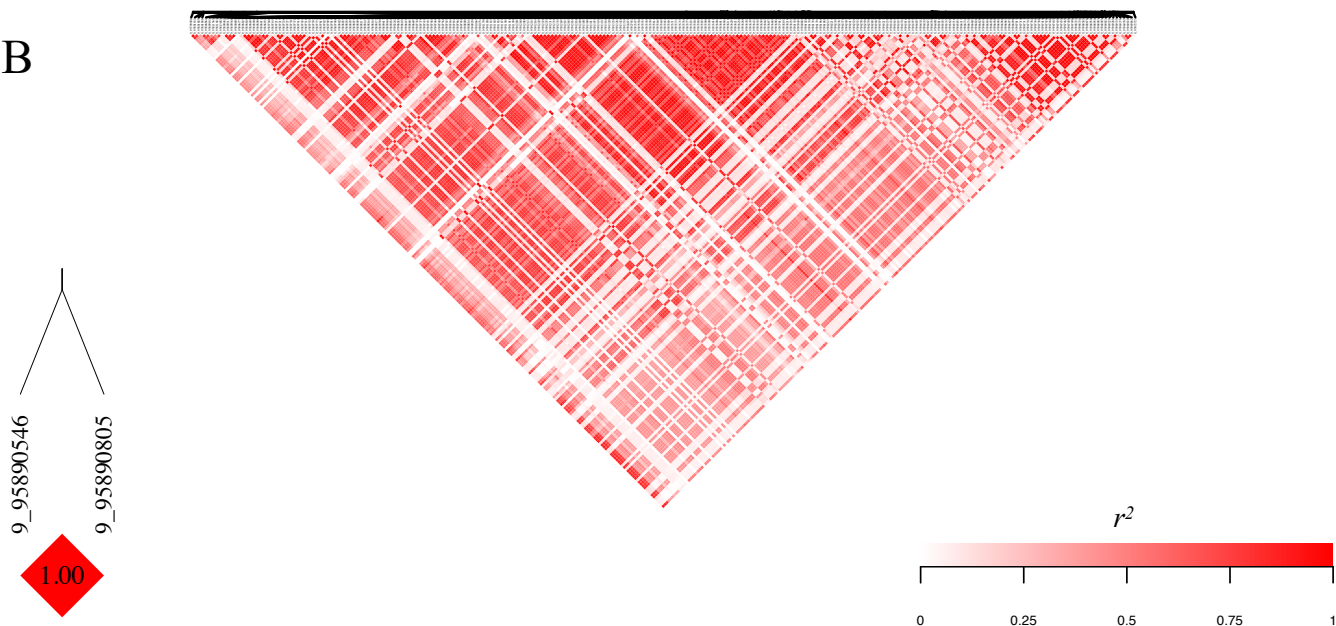

# GWAS, eQTL and eCAVIAR results at *hggt1* for $\delta T3$

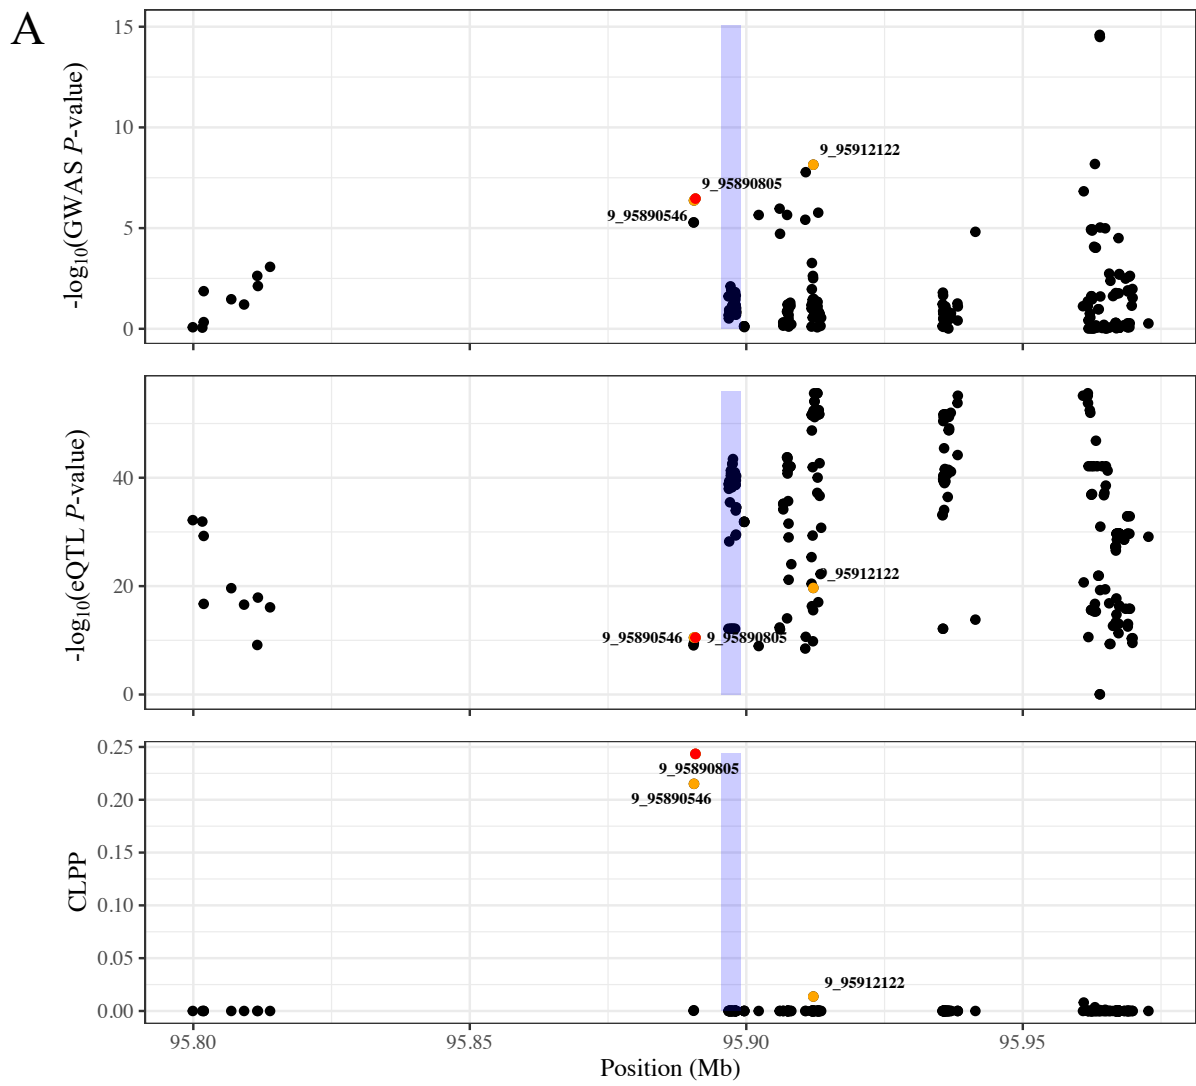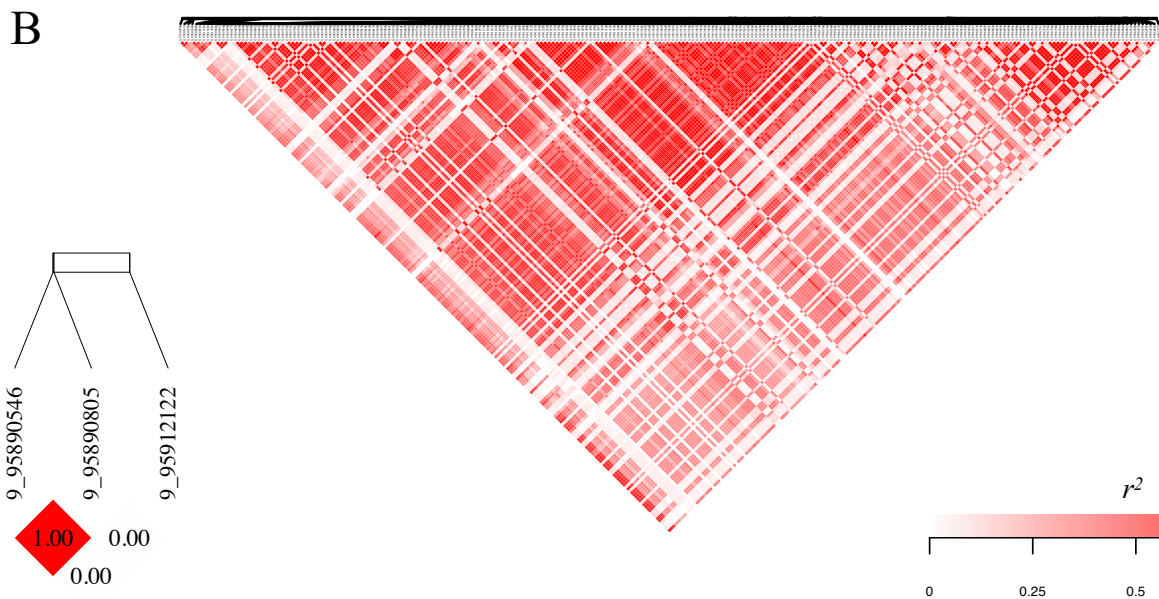

# GWAS, eQTL and eCAVIAR results at *hggt1* for $\gamma$ T3

A

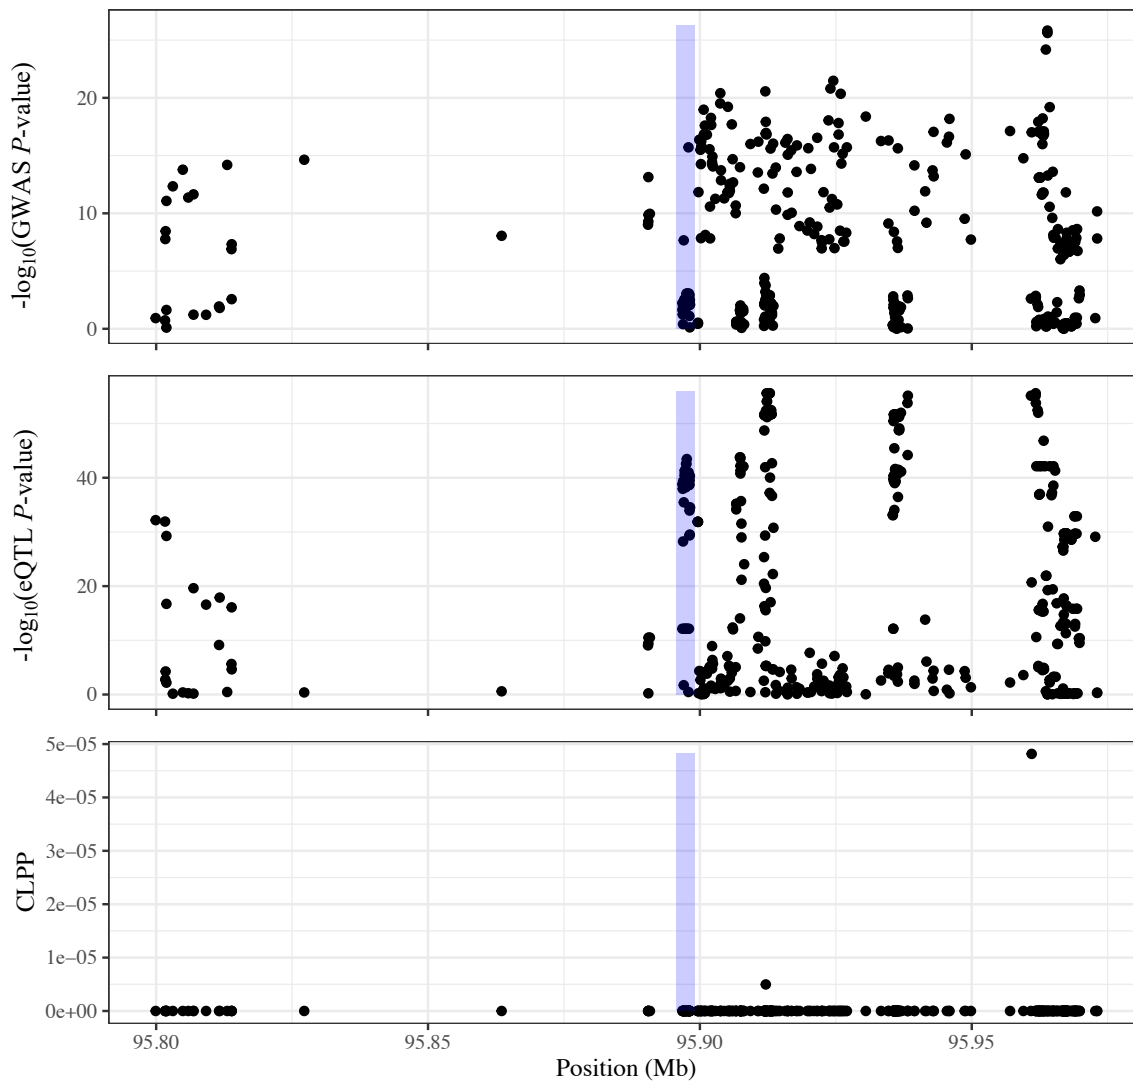

B

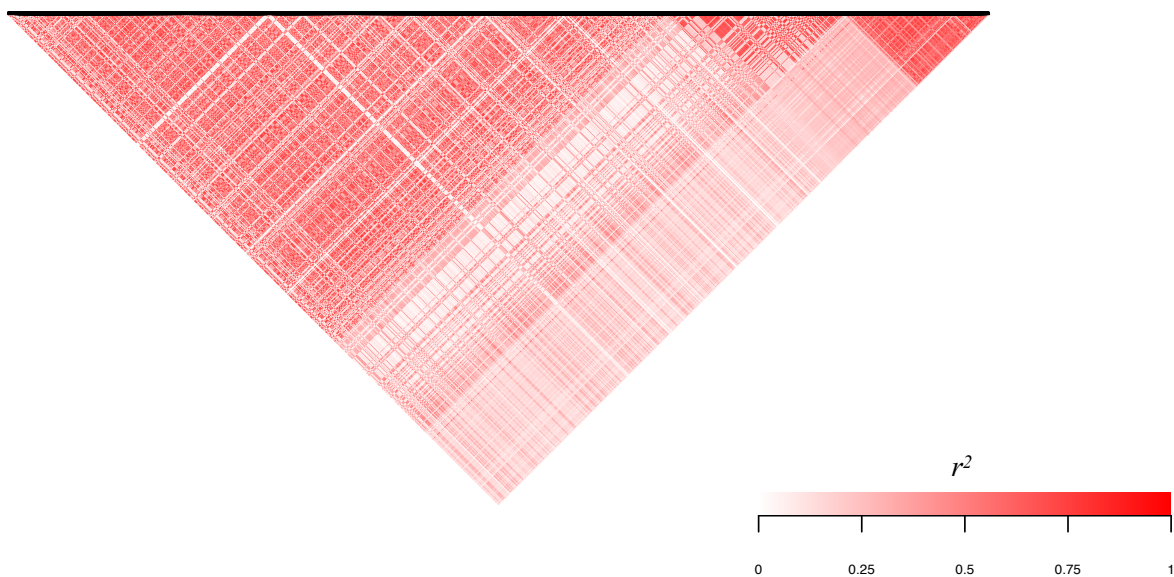

# GWAS, eQTL and eCAVIAR results at *hppd1* for $\gamma$ T3

A

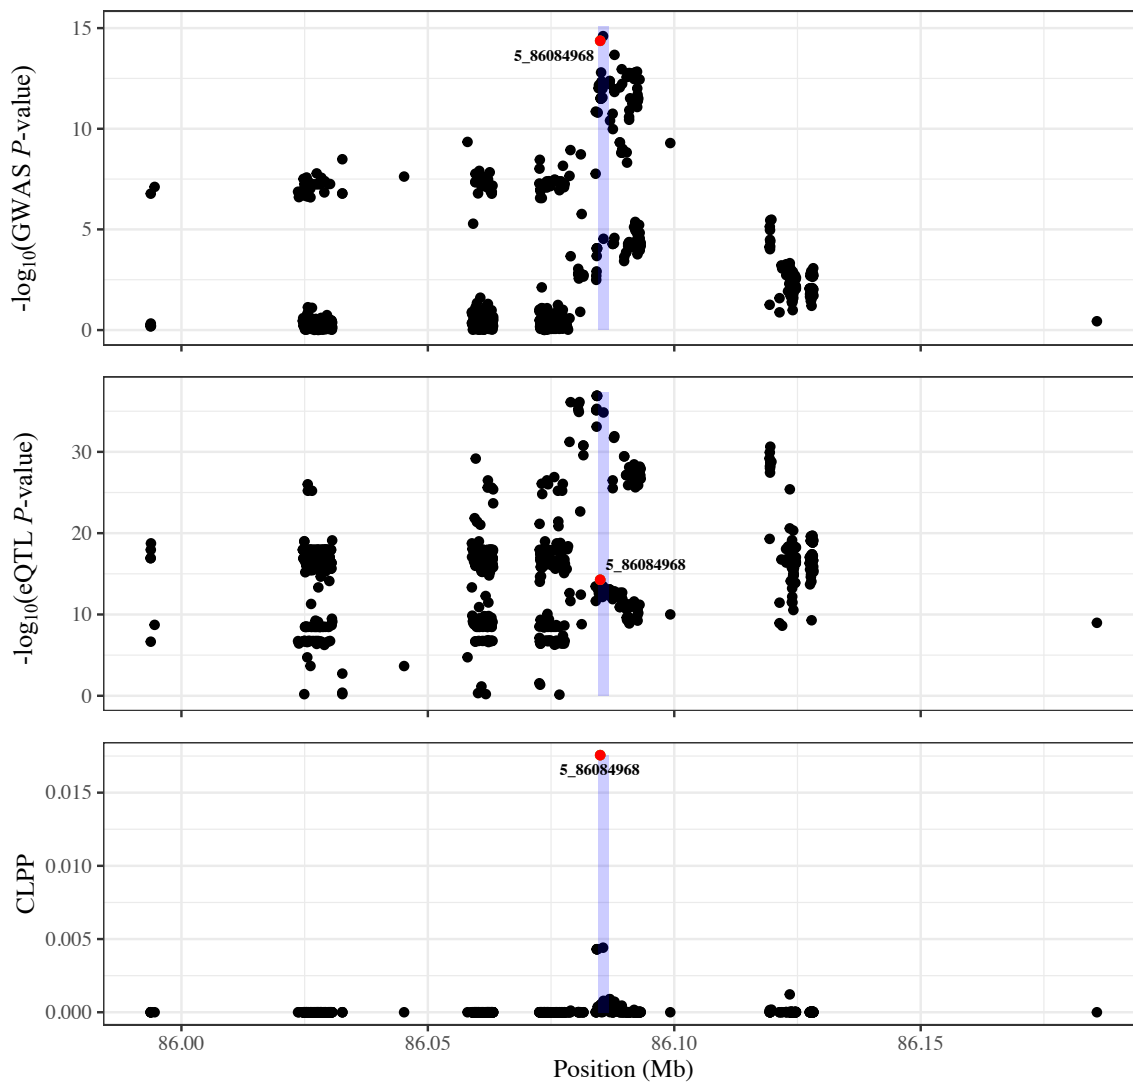

B

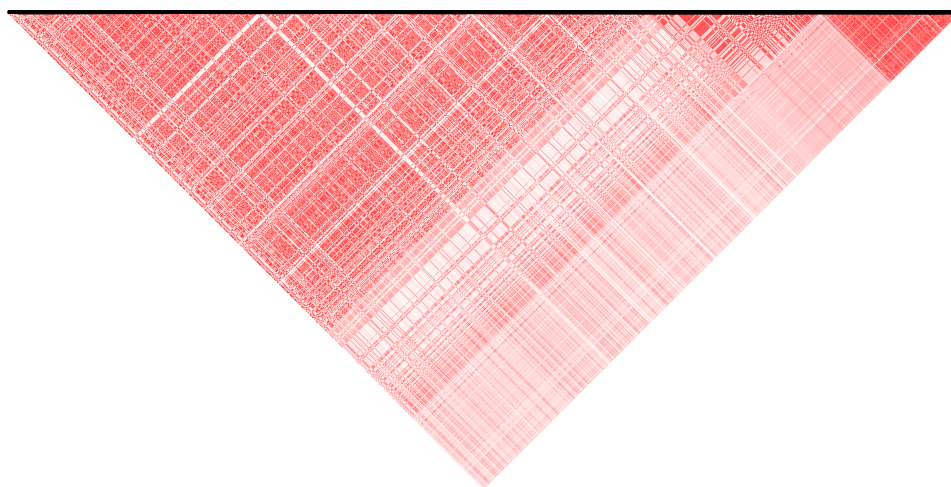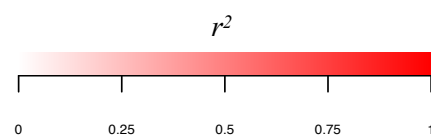

# GWAS, eQTL and eCAVIAR results at *hppd1* for $\Sigma T3$

A

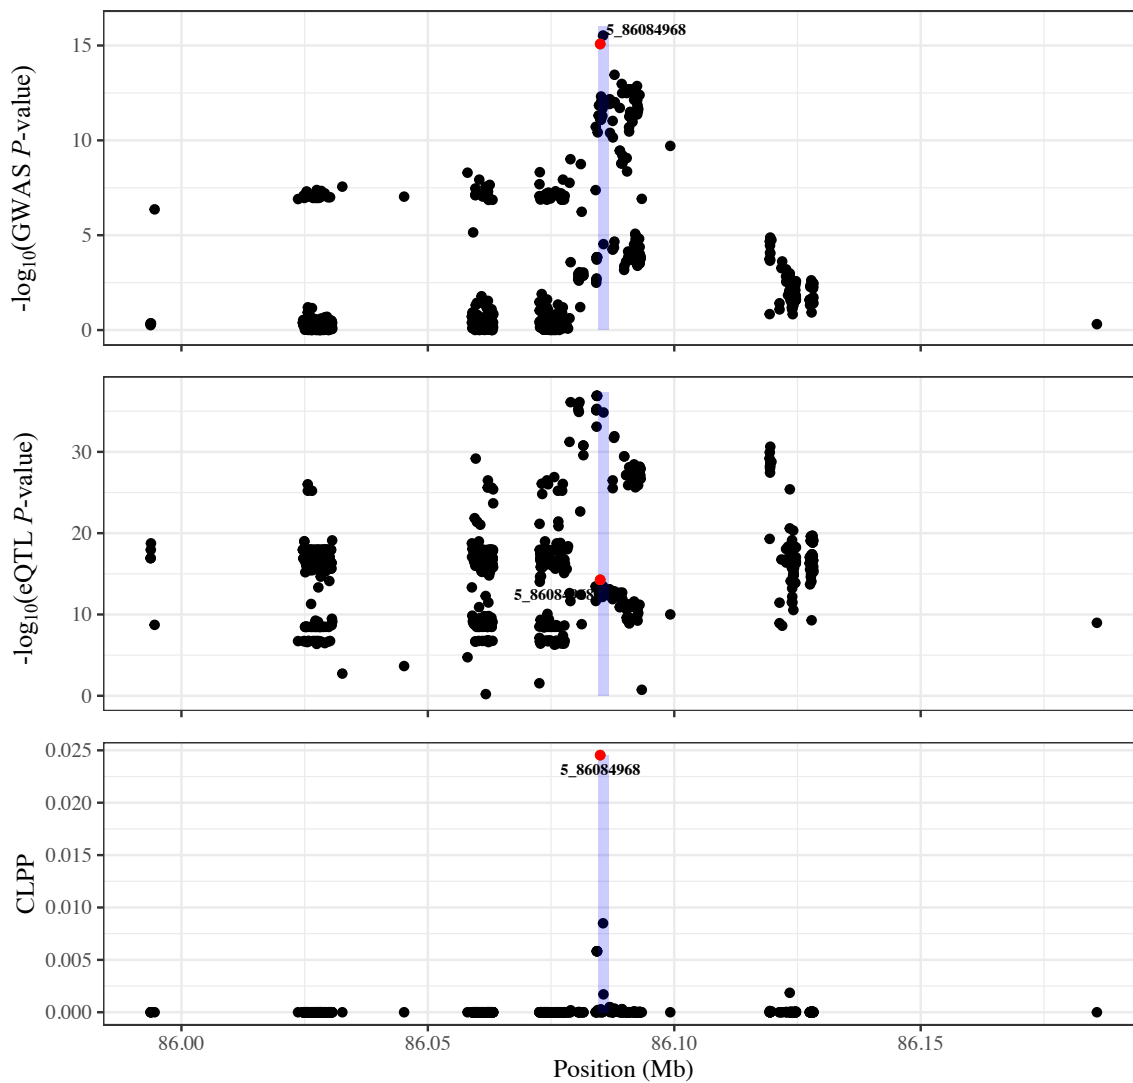

B

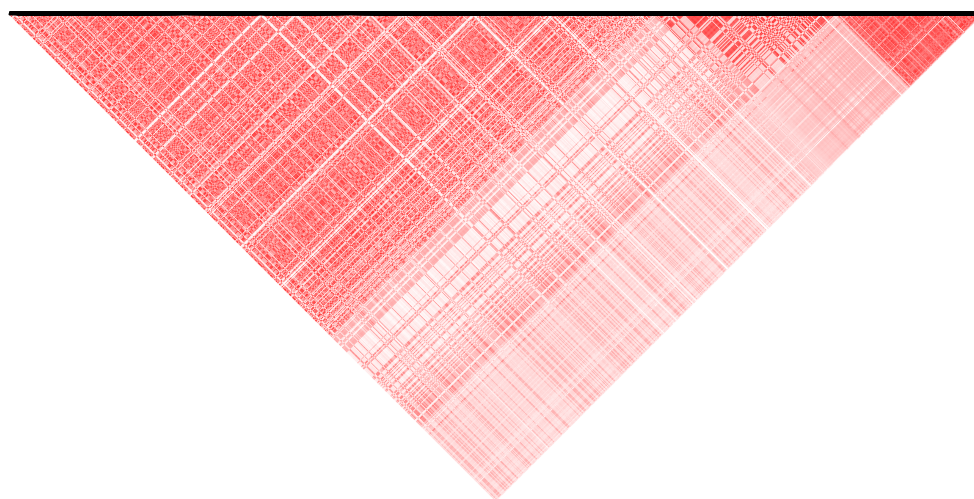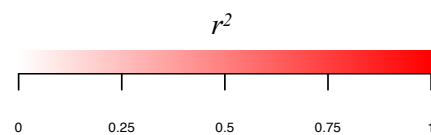

# GWAS, eQTL and eCAVIAR results at *por1* for $\Sigma T$

A

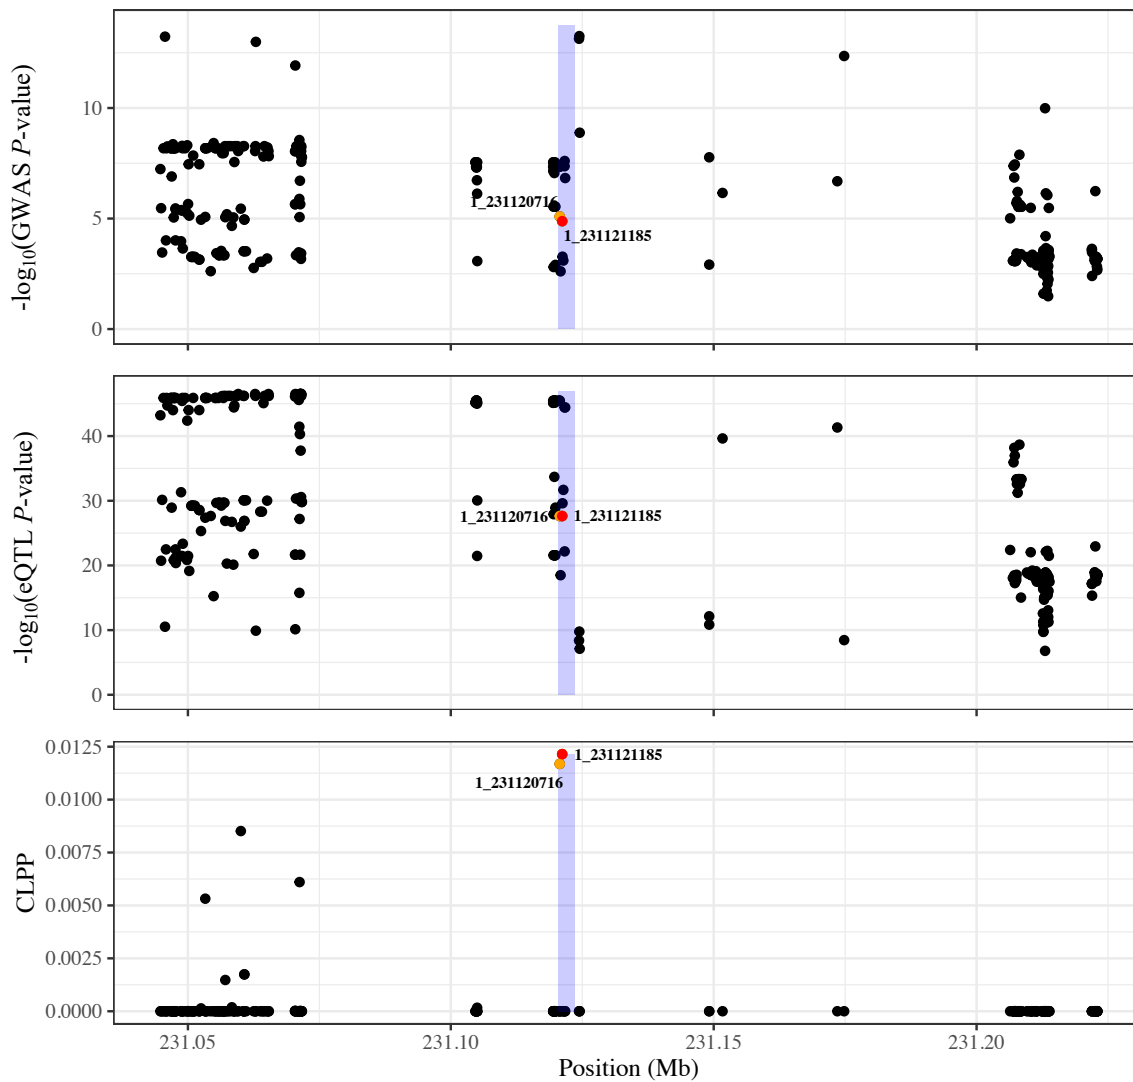

B

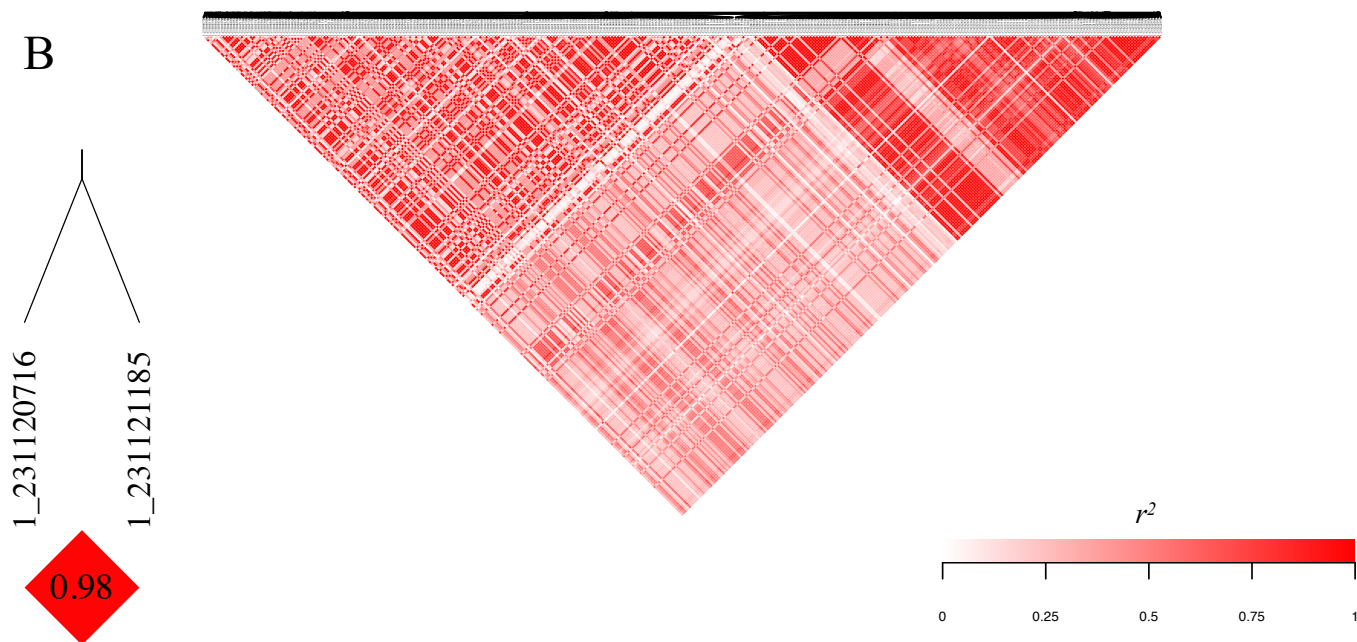



# GWAS, eQTL and eCAVIAR results at *por2* for $\gamma$ T

A

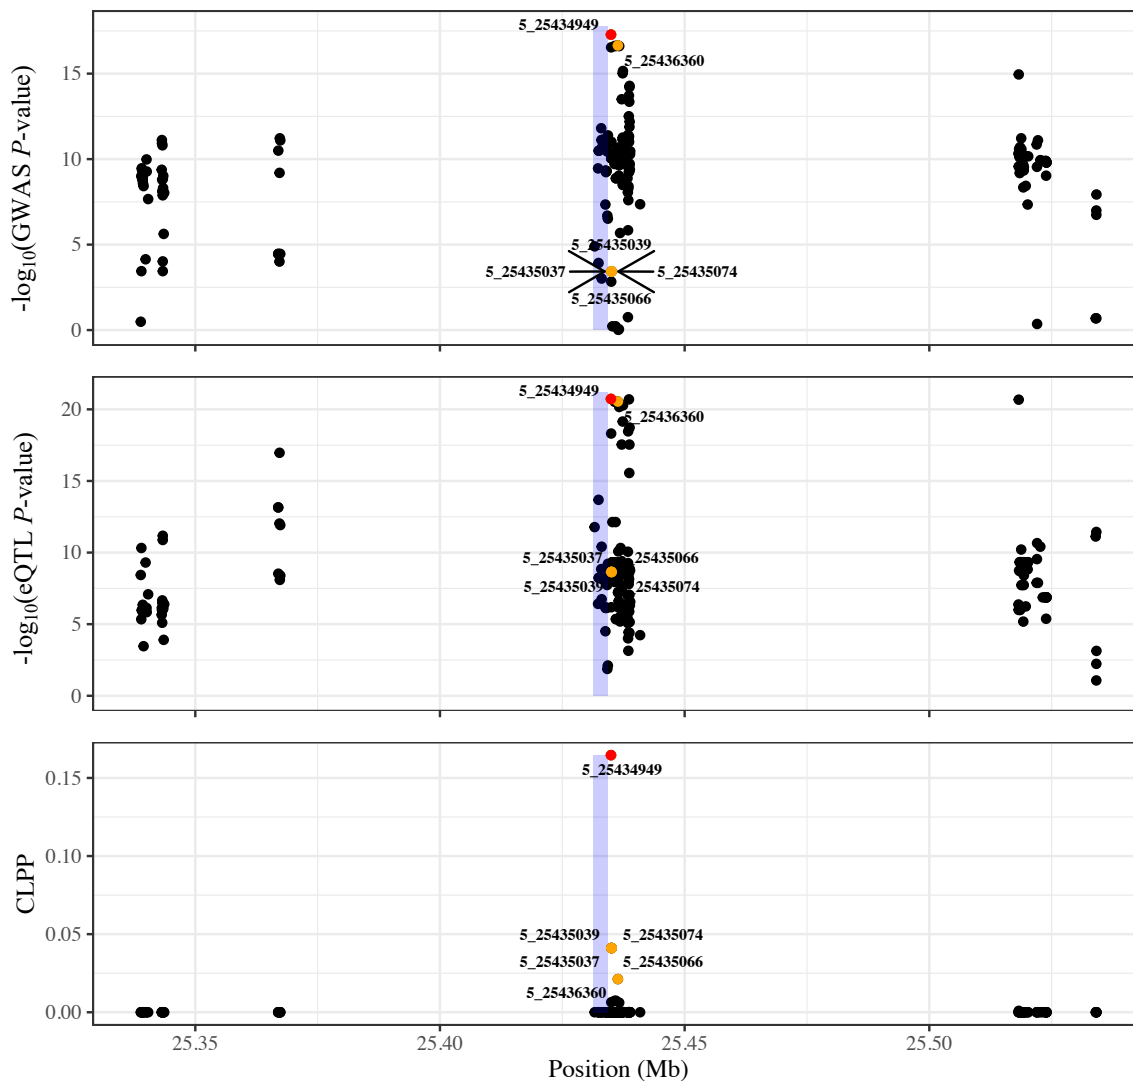

B

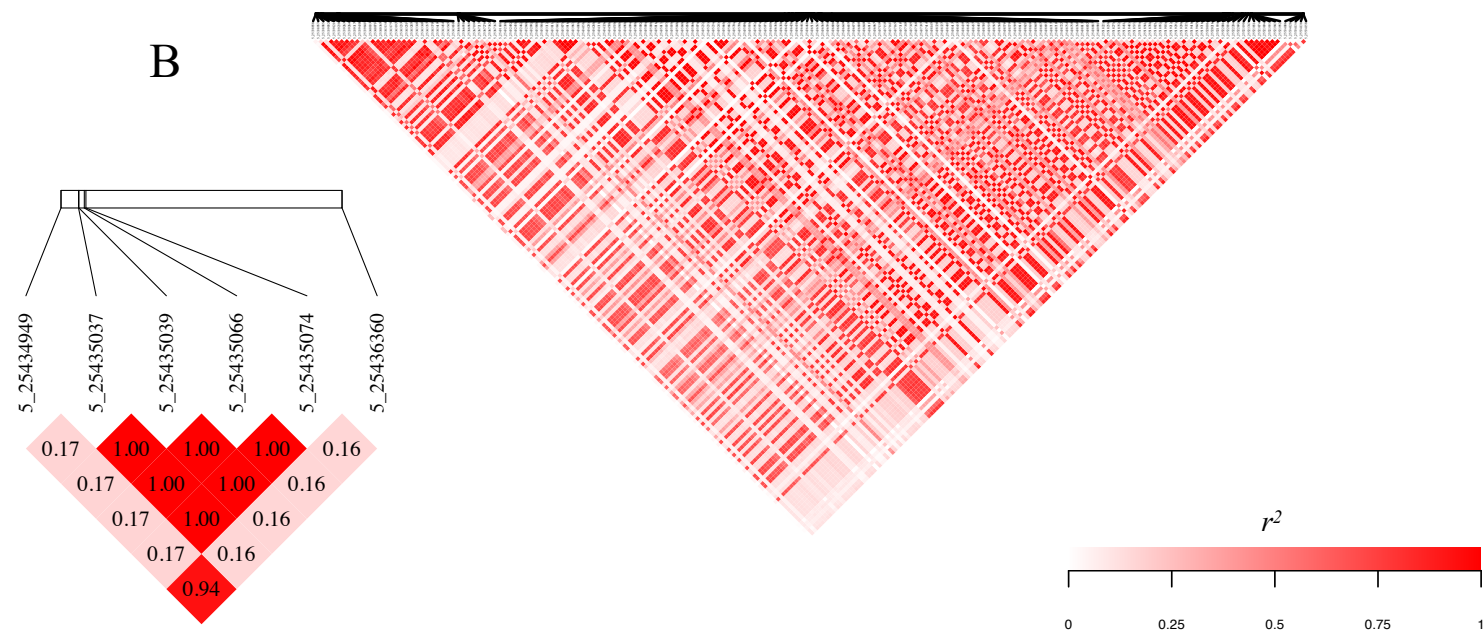



# GWAS, eQTL and eCAVIAR results at *por2* for $\Sigma$ TT3

A

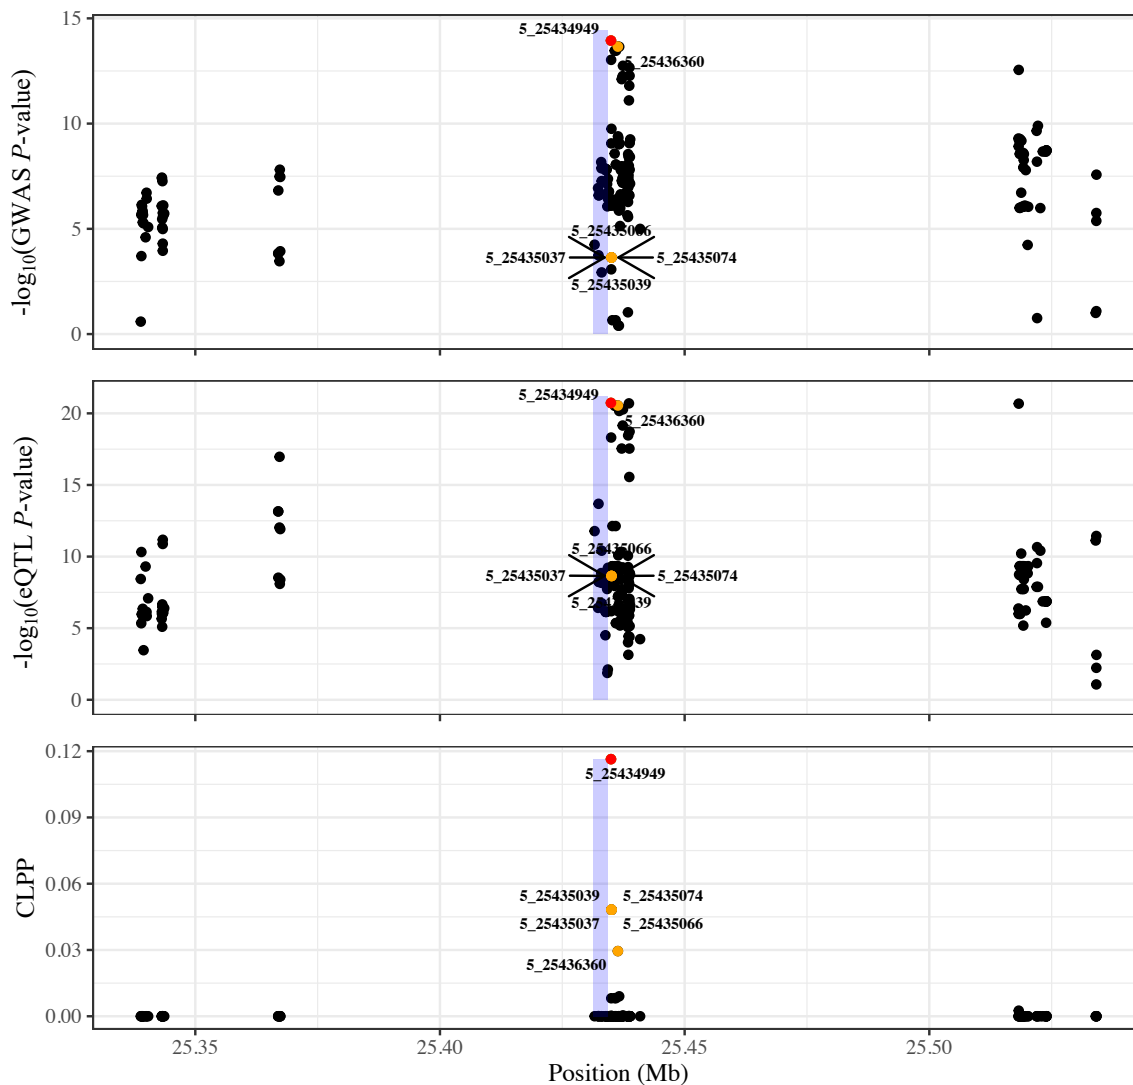

B

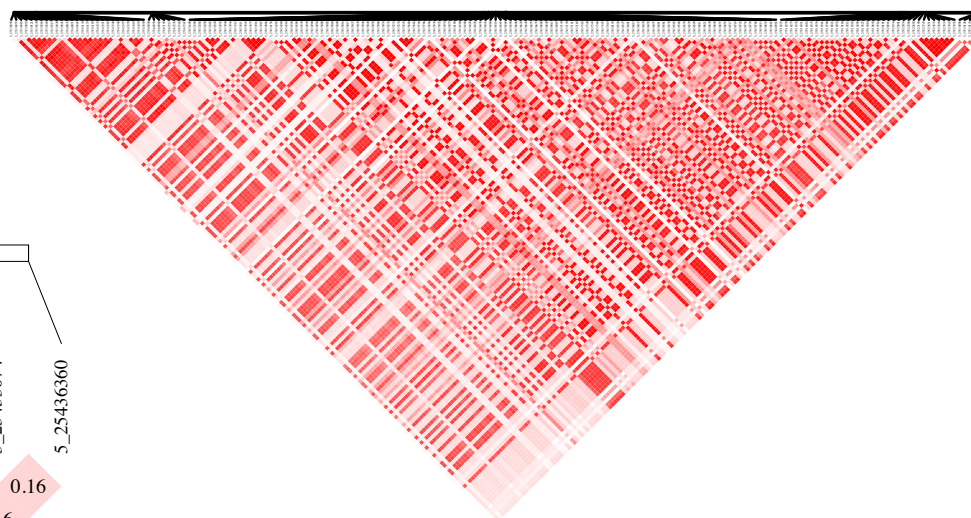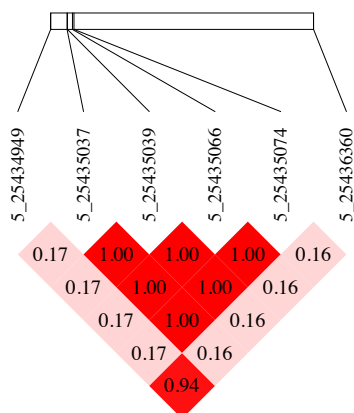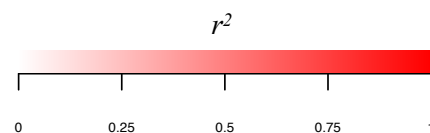

# GWAS, eQTL and eCAVIAR results at *por2* for $\Sigma T$

A

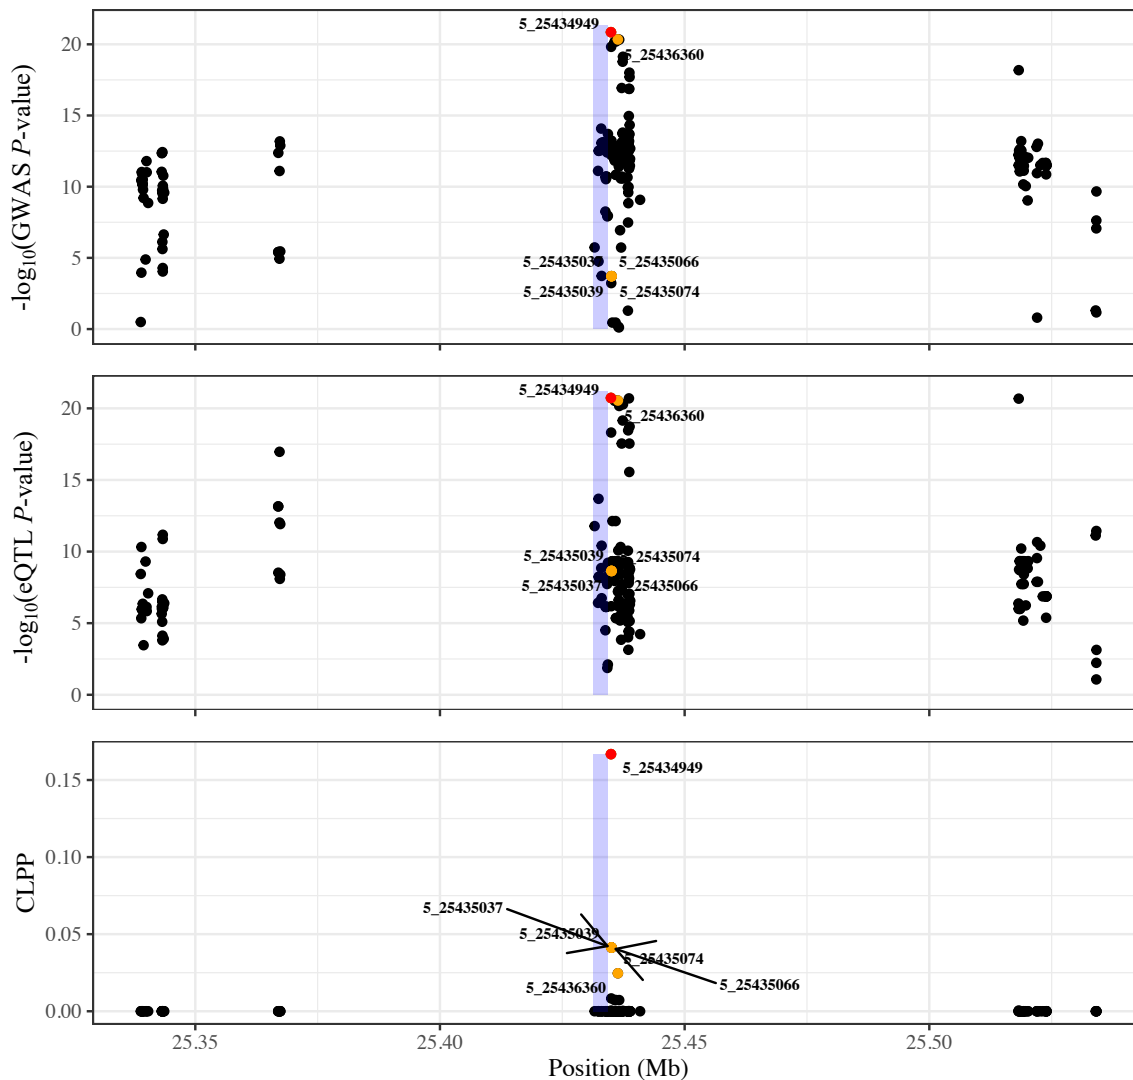

B

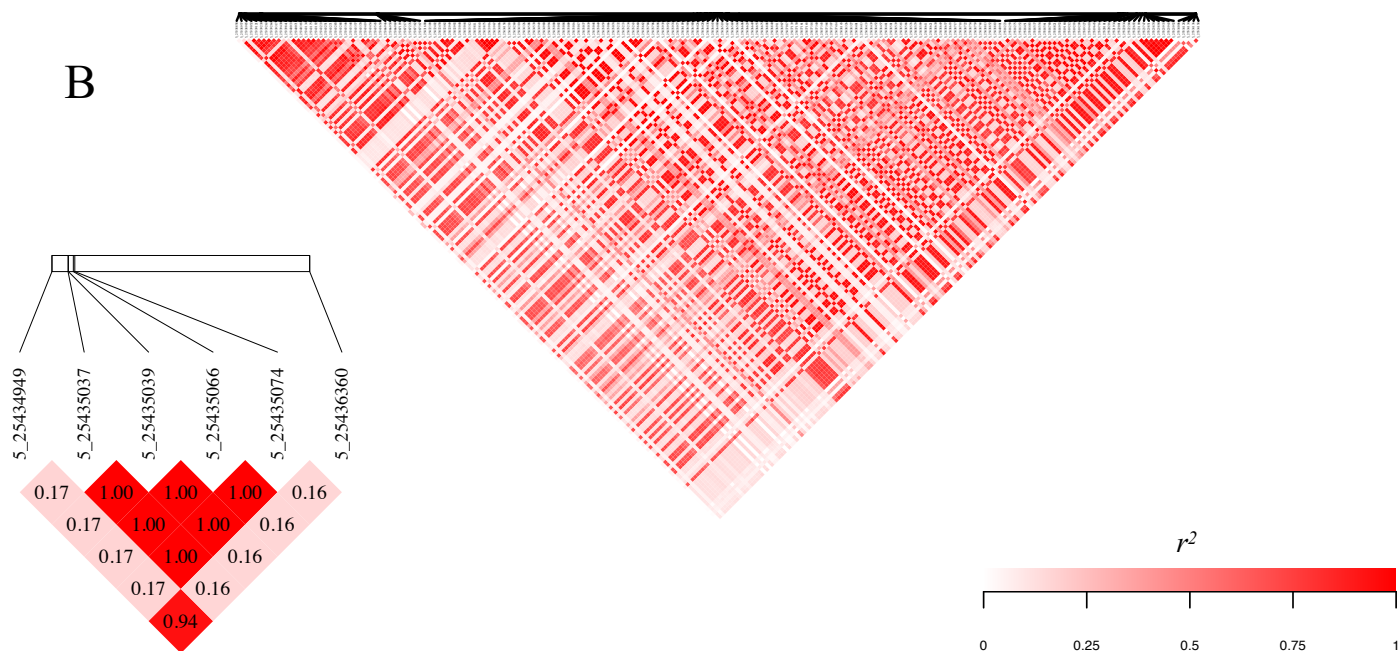

# GWAS, eQTL and eCAVIAR results at *samt1* for $\alpha$ T3

A

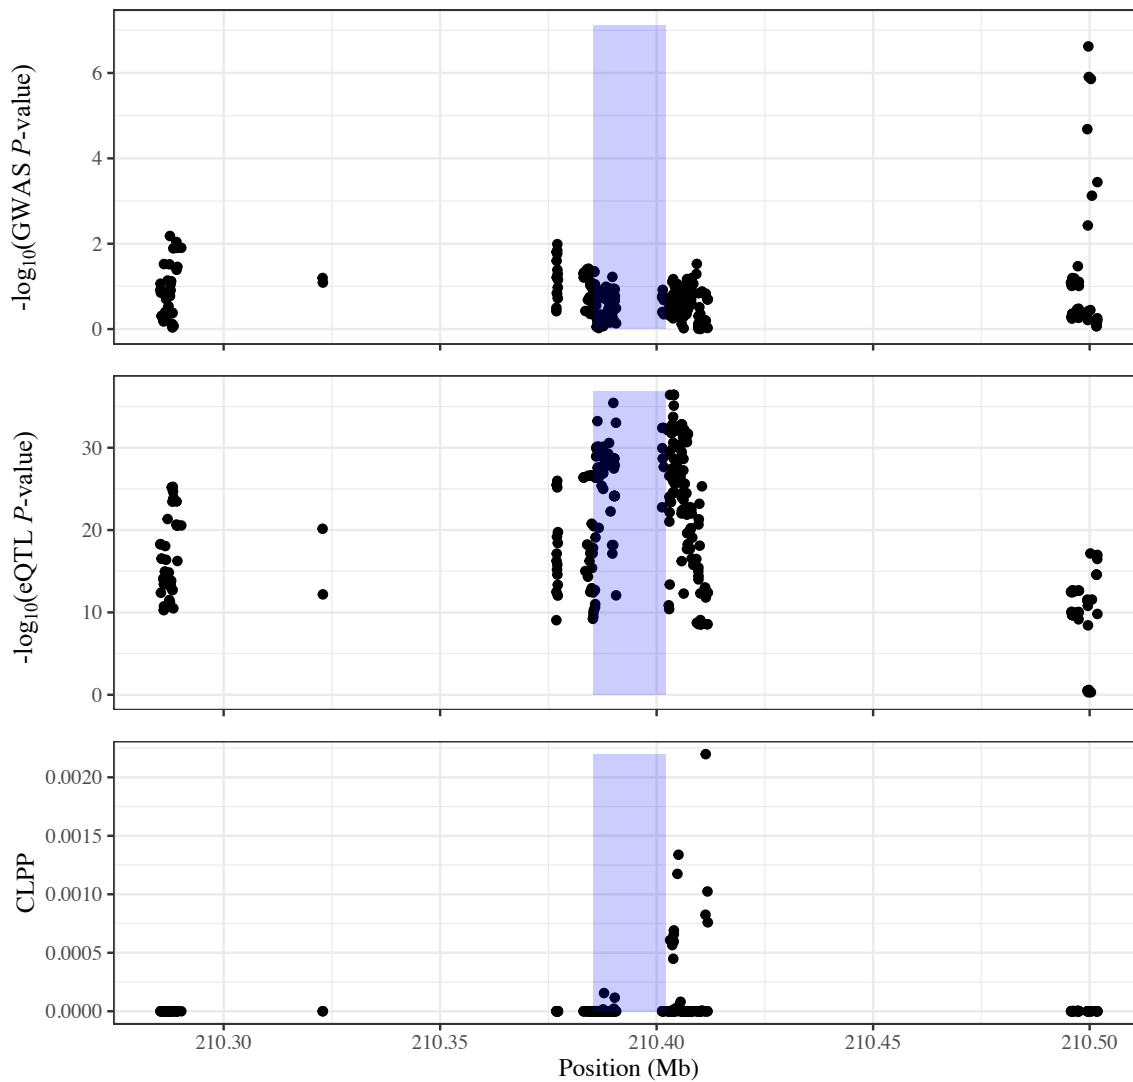

B

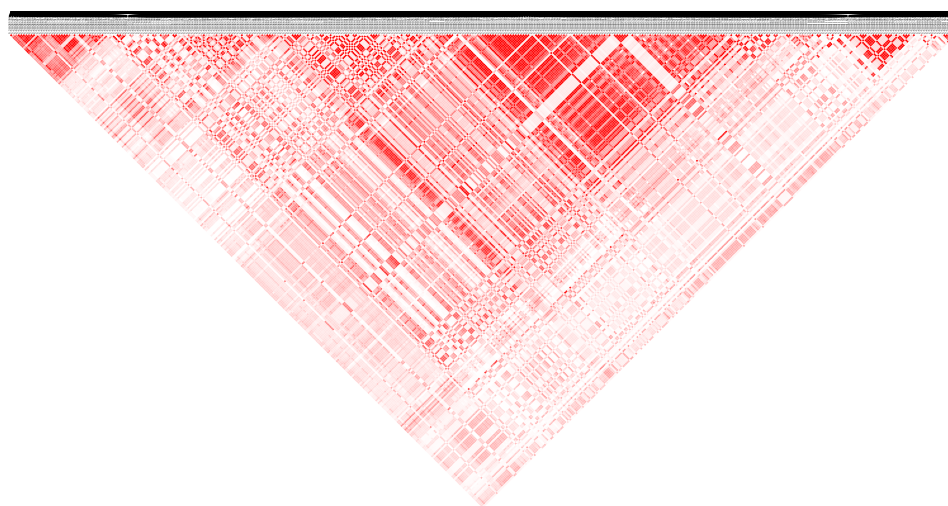

# GWAS, eQTL and eCAVIAR results at *samt1* for $\delta T$

A

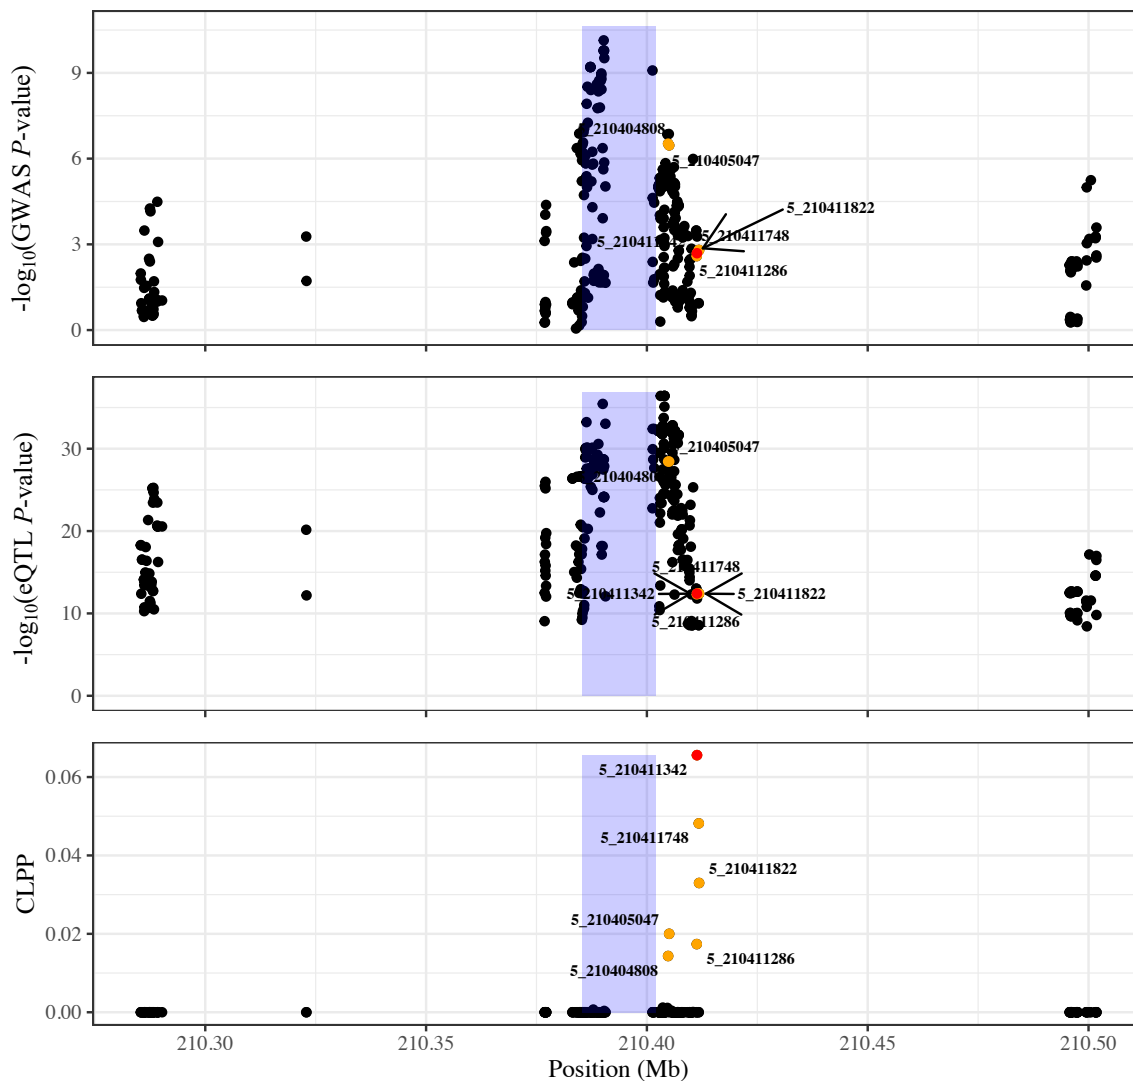

B

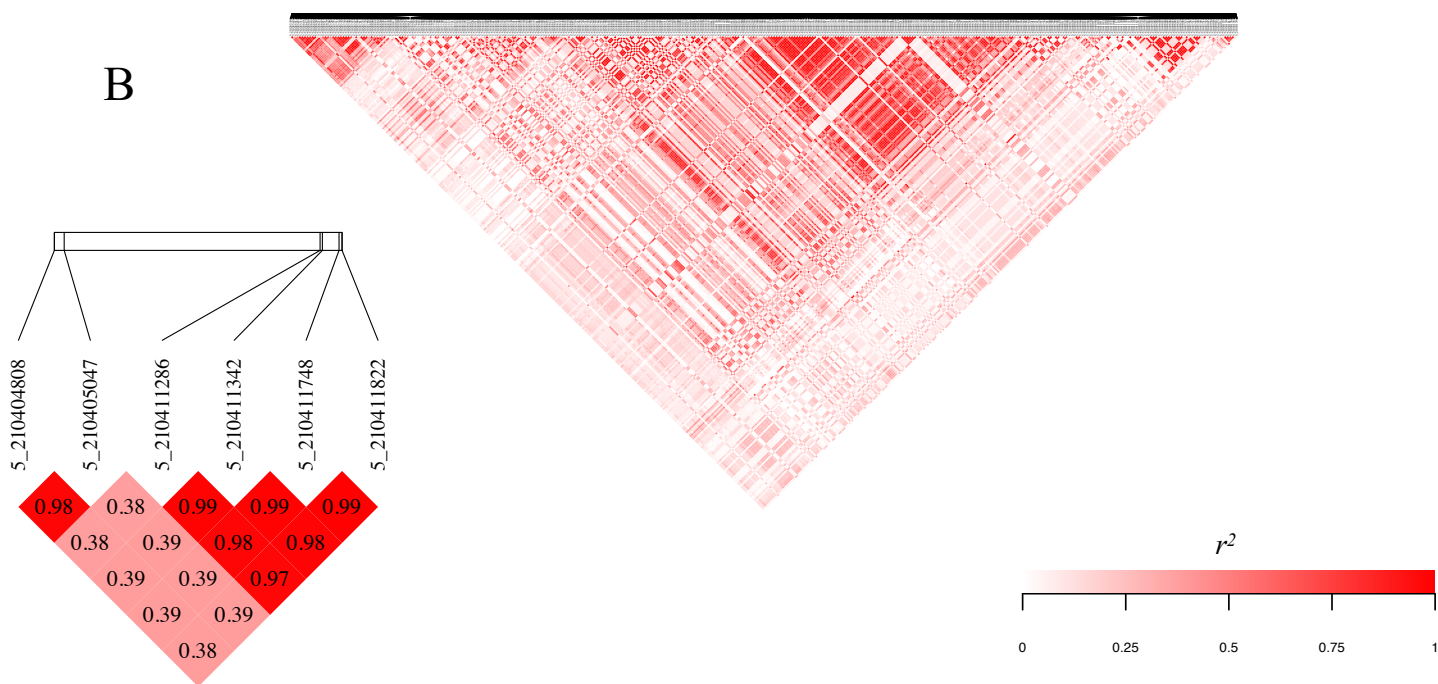

# GWAS, eQTL and eCAVIAR results at *vte1* for $\delta T3$

A

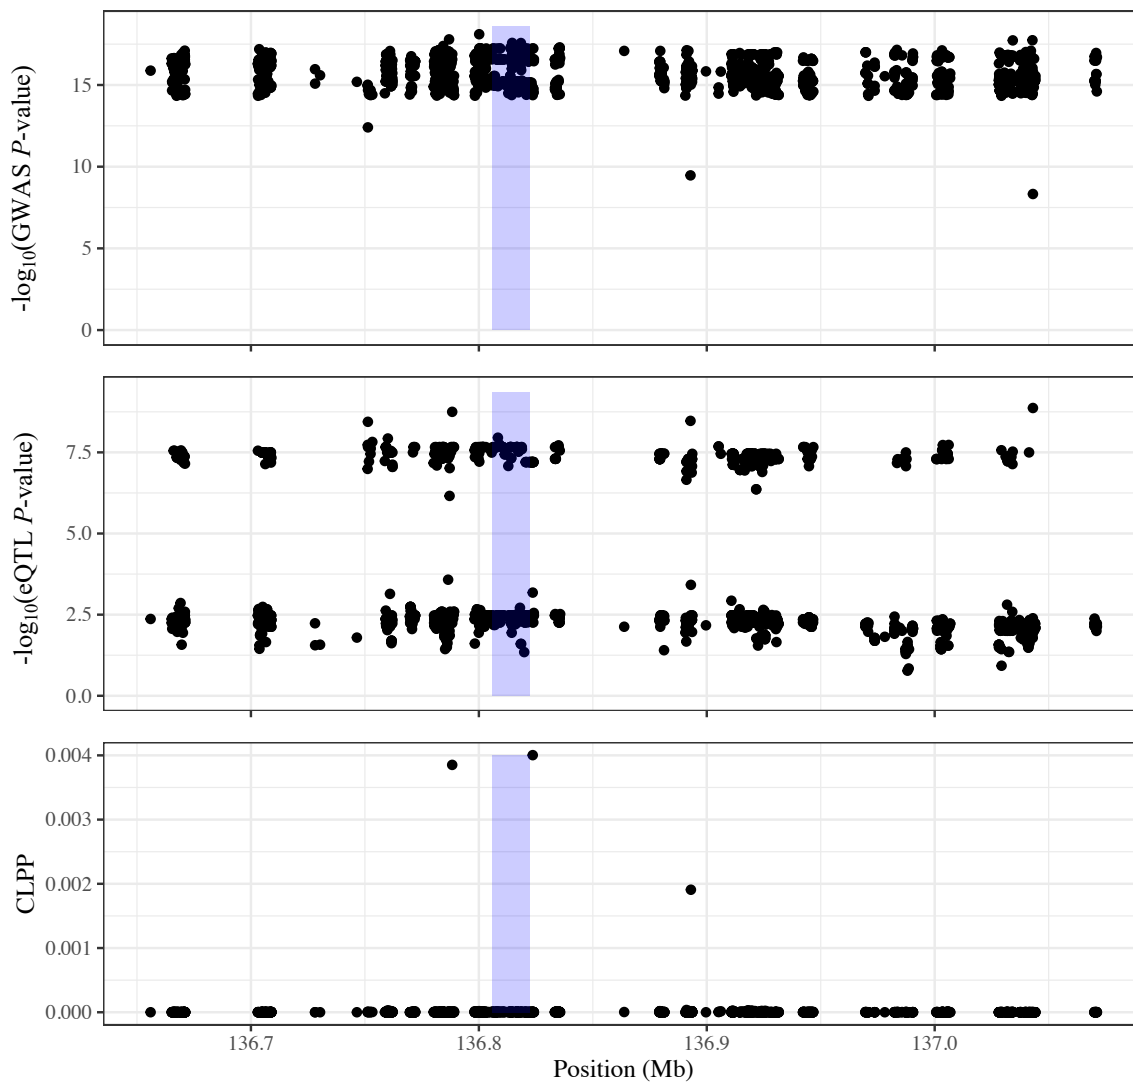

B

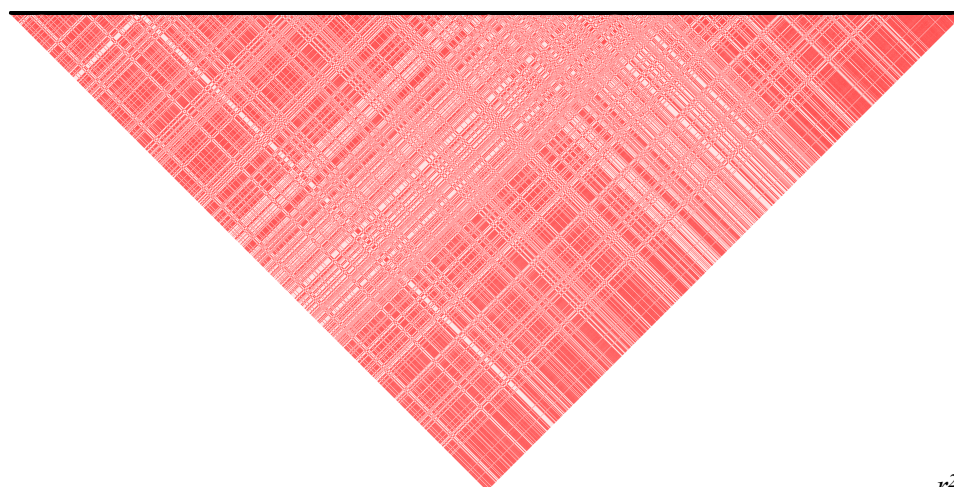

# GWAS, eQTL and eCAVIAR results at *vte4* for $\alpha$ T

A

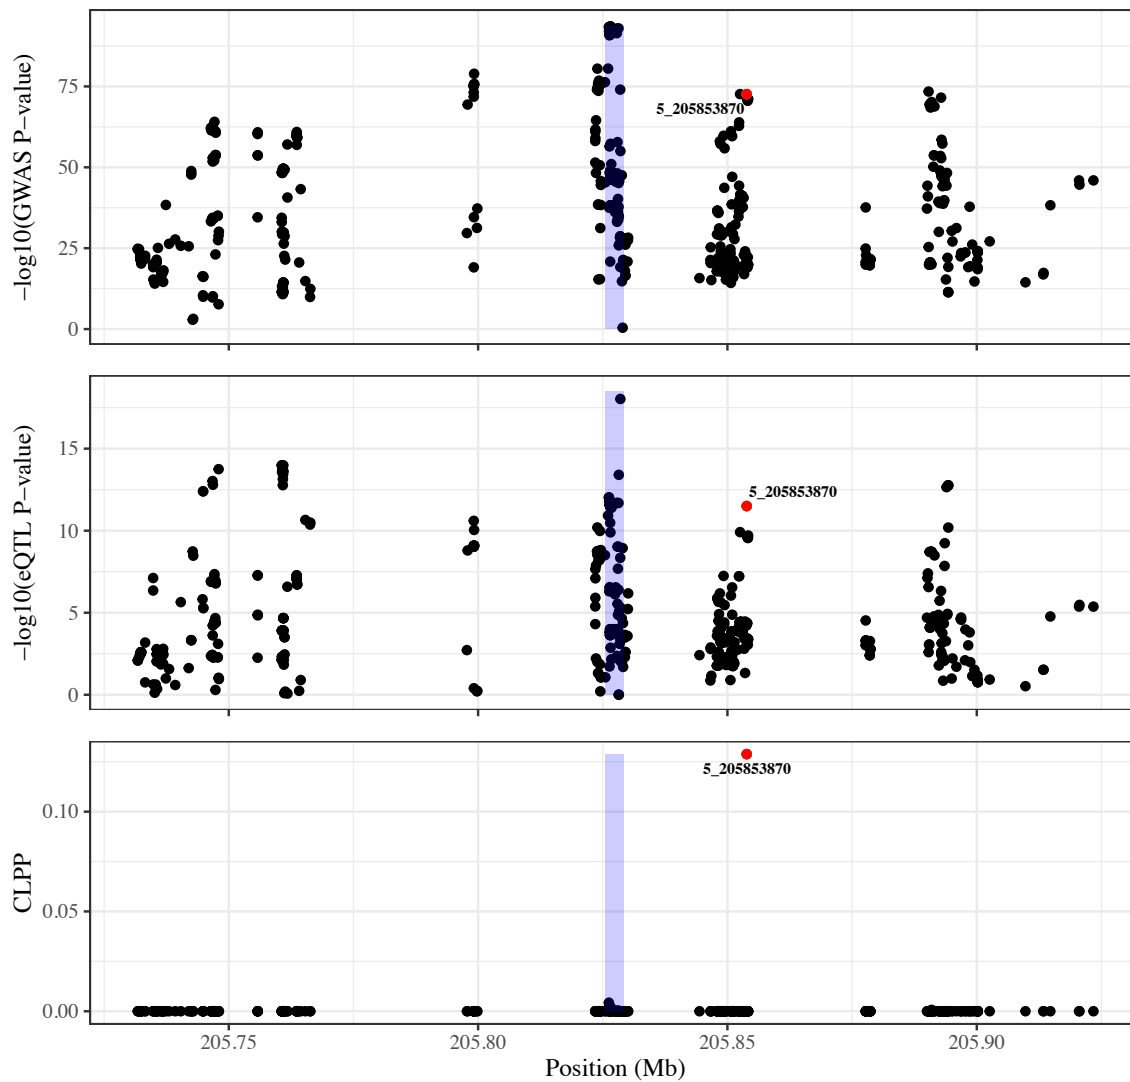

B

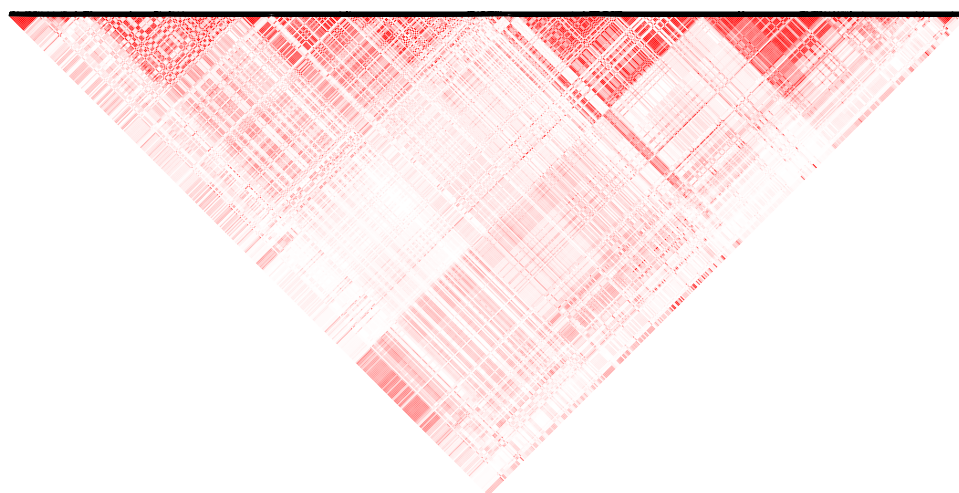

# GWAS, eQTL and eCAVIAR results at *vte4* for $\alpha$ T3

A

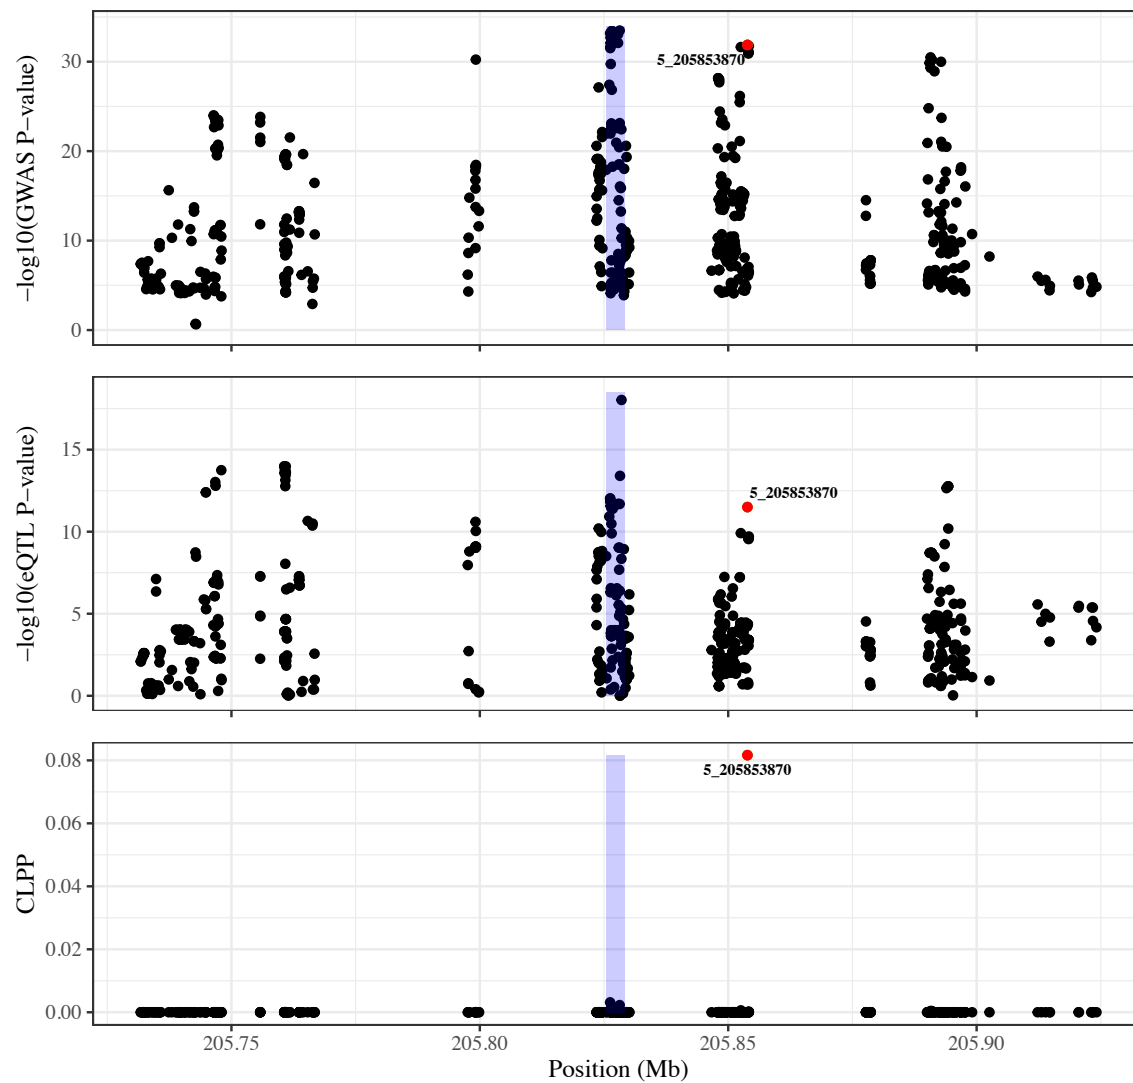

B

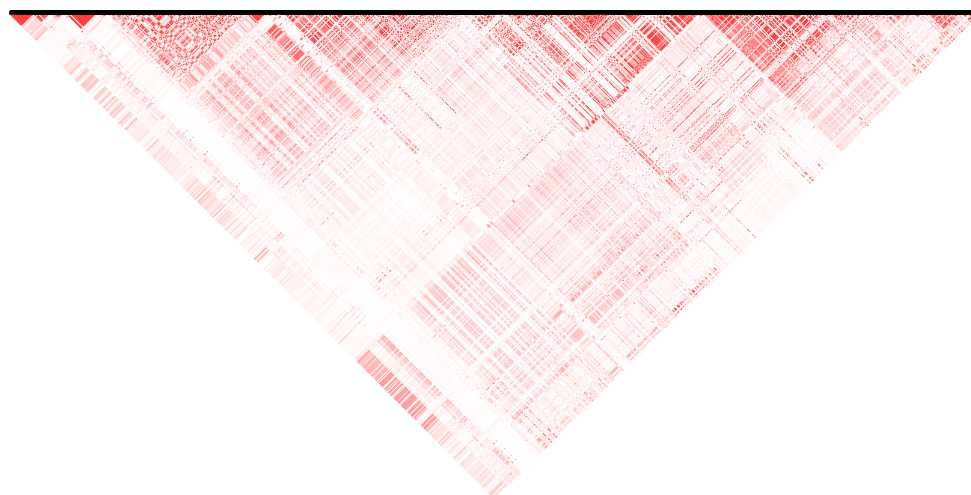



## GWAS, eQTL and eCAVIAR results at *vte4* for $\delta T$

# A

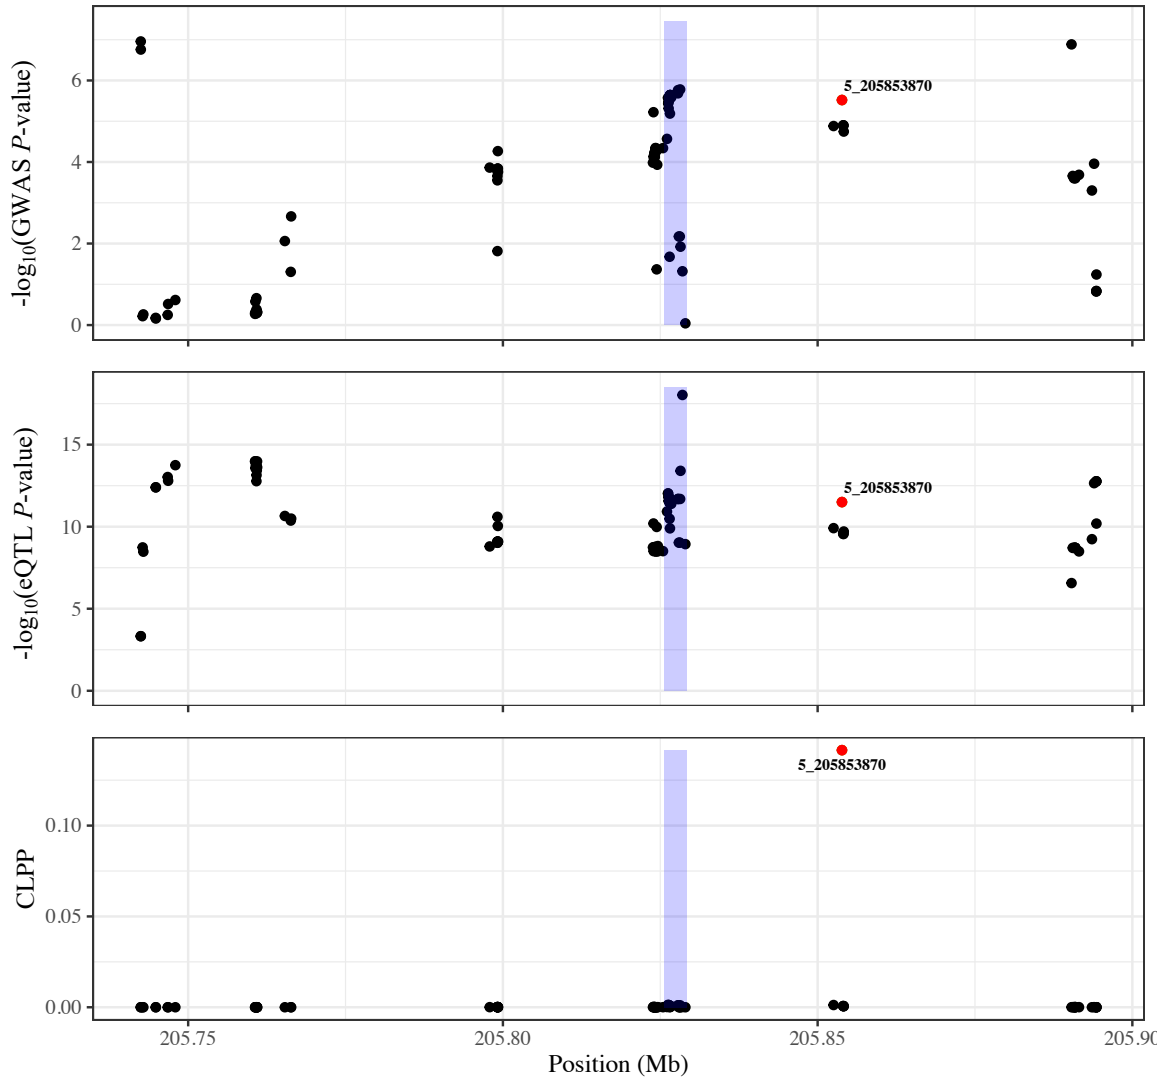

B

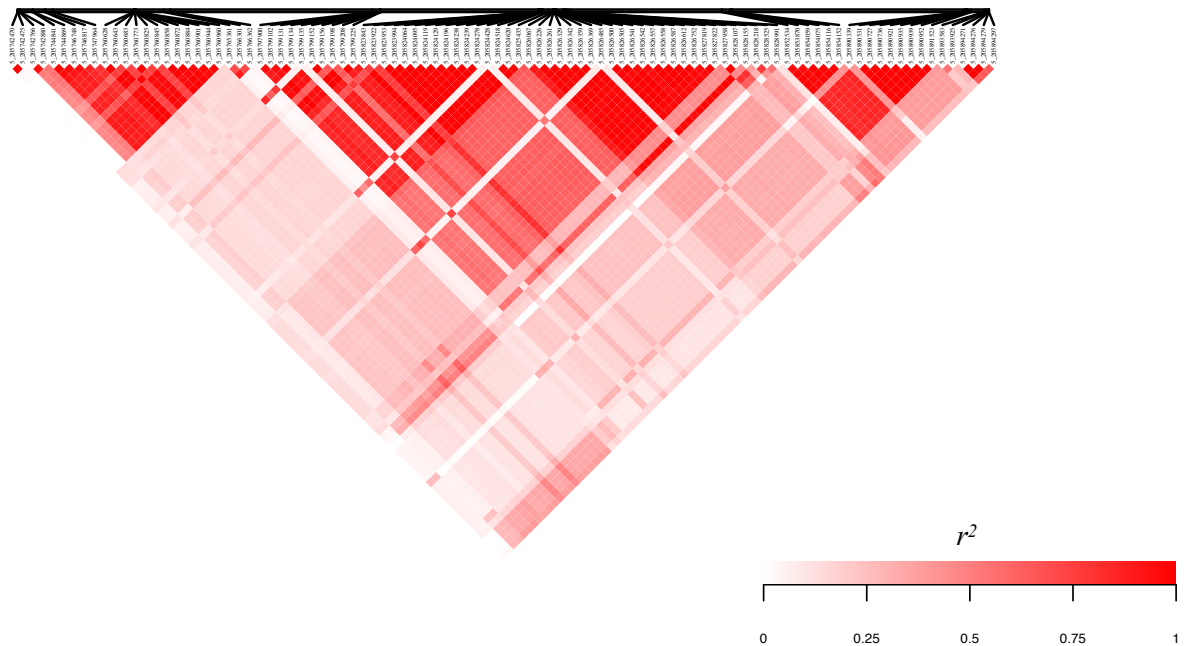



# GWAS, eQTL and eCAVIAR results at *vte4* for $\gamma$ T

A

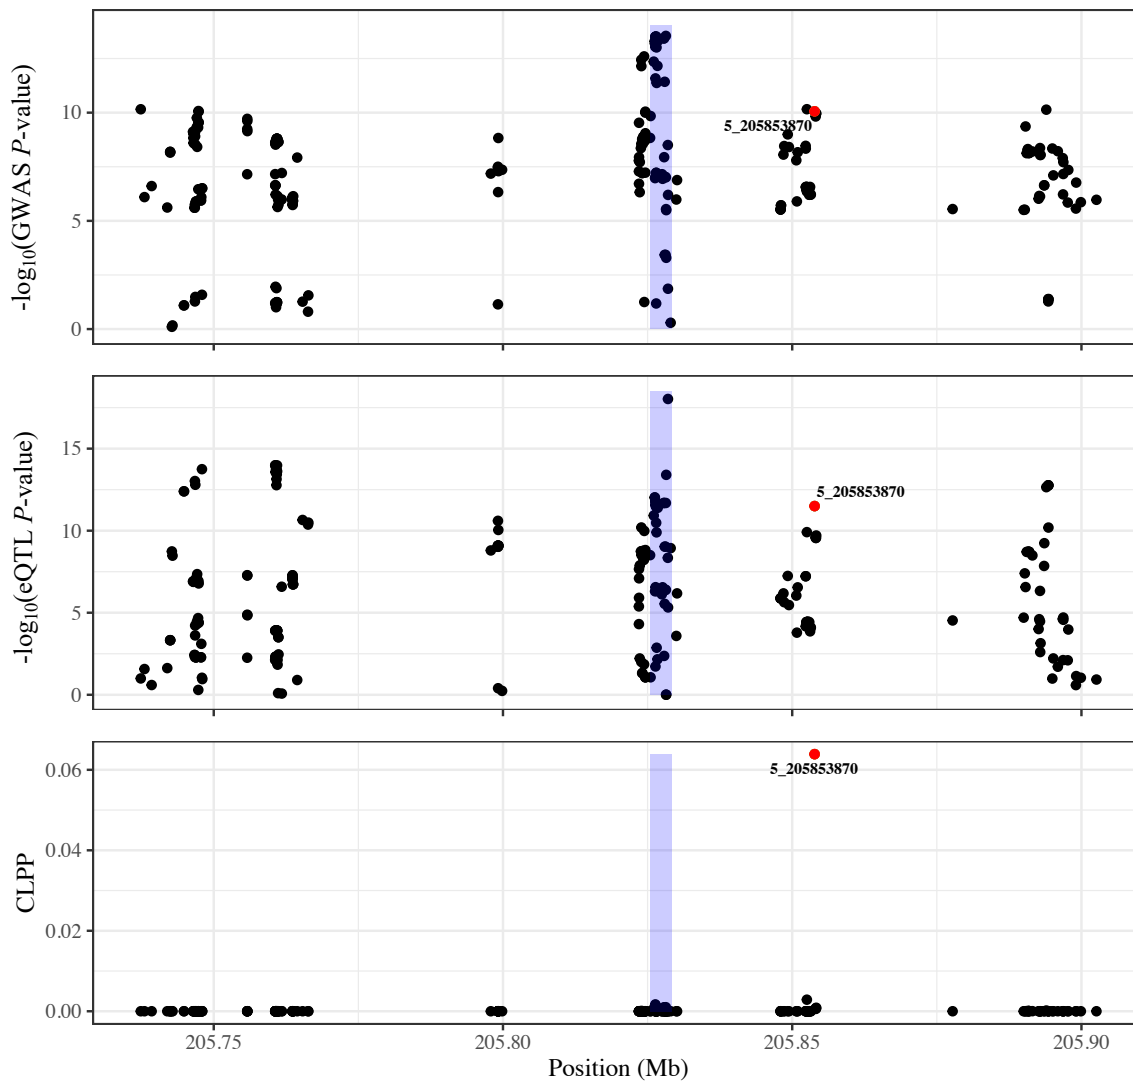

B

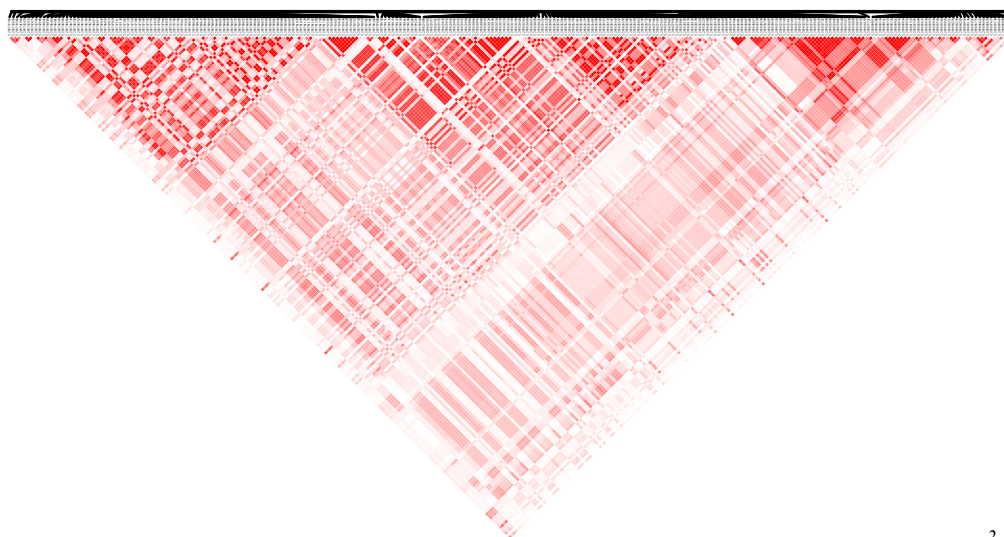

# GWAS, eQTL and eCAVIAR results at *vte4* for $\gamma$ T3

A

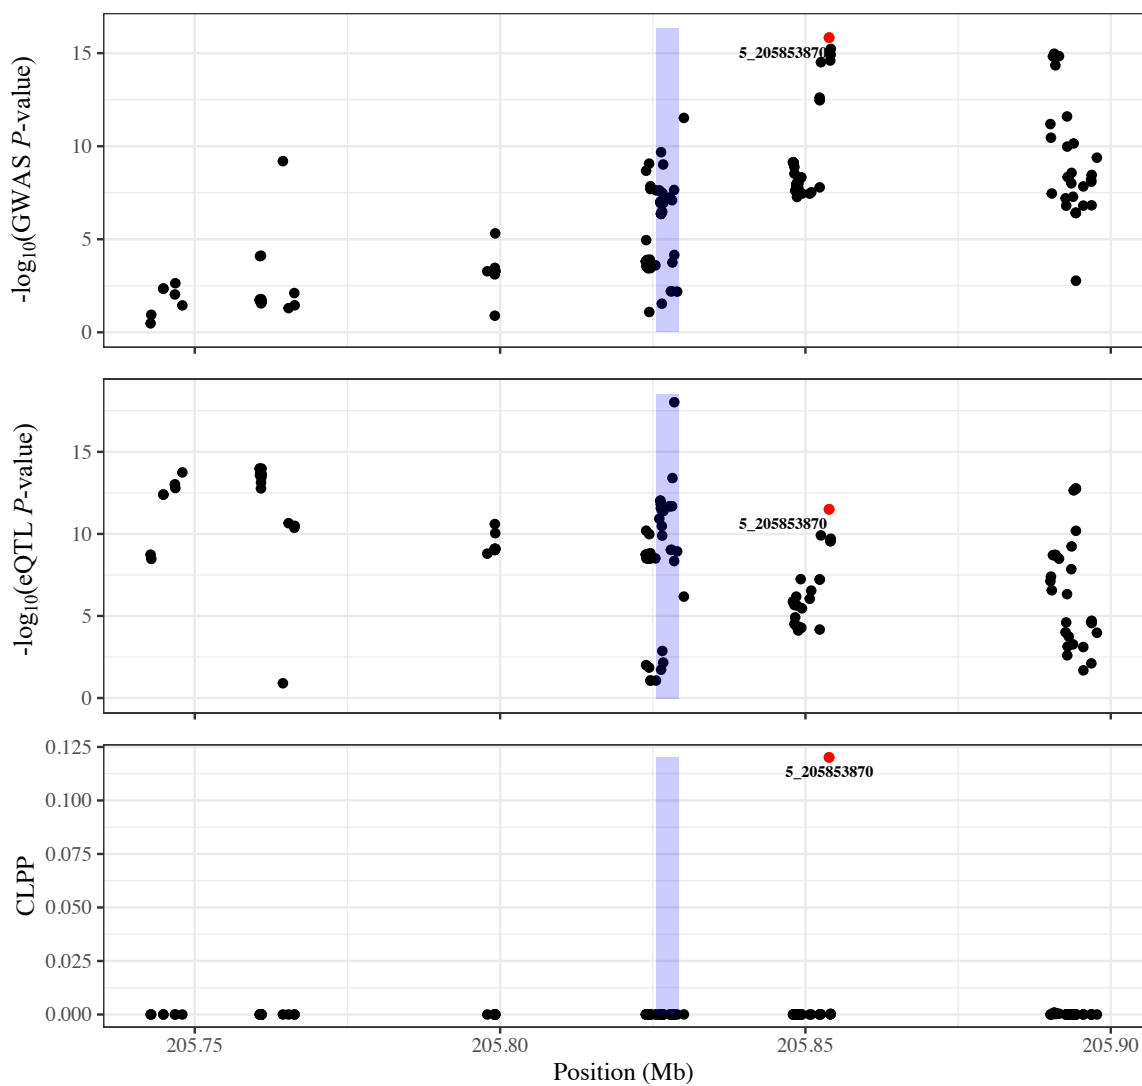

B

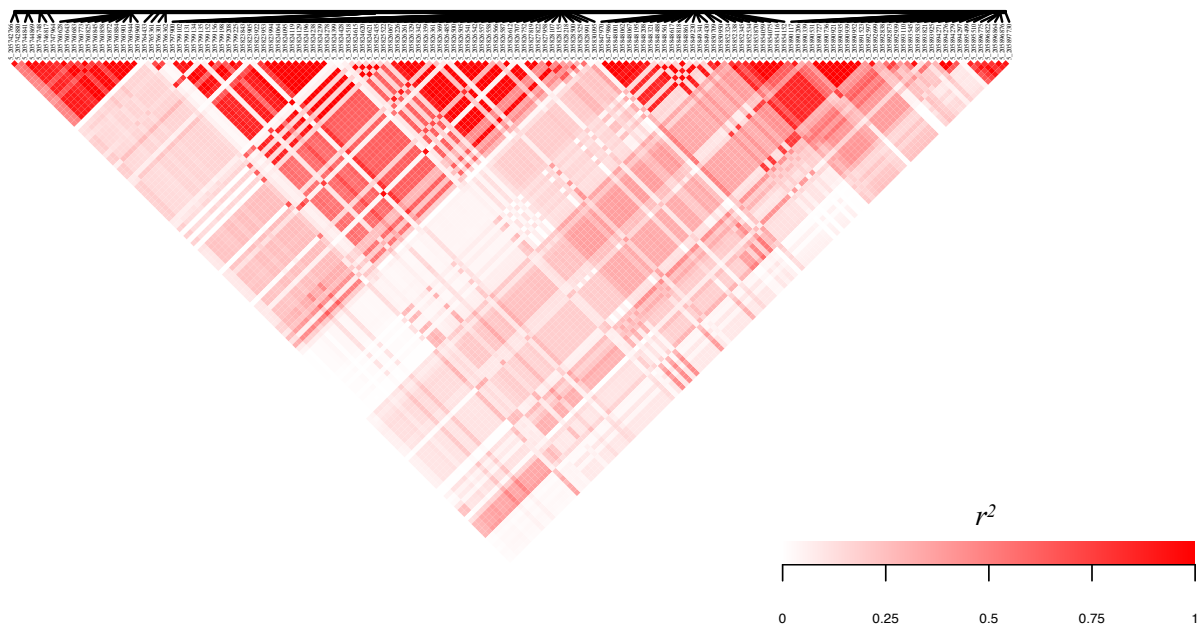

# GWAS, eQTL and eCAVIAR results at *vte4* for $\Sigma T3$

A

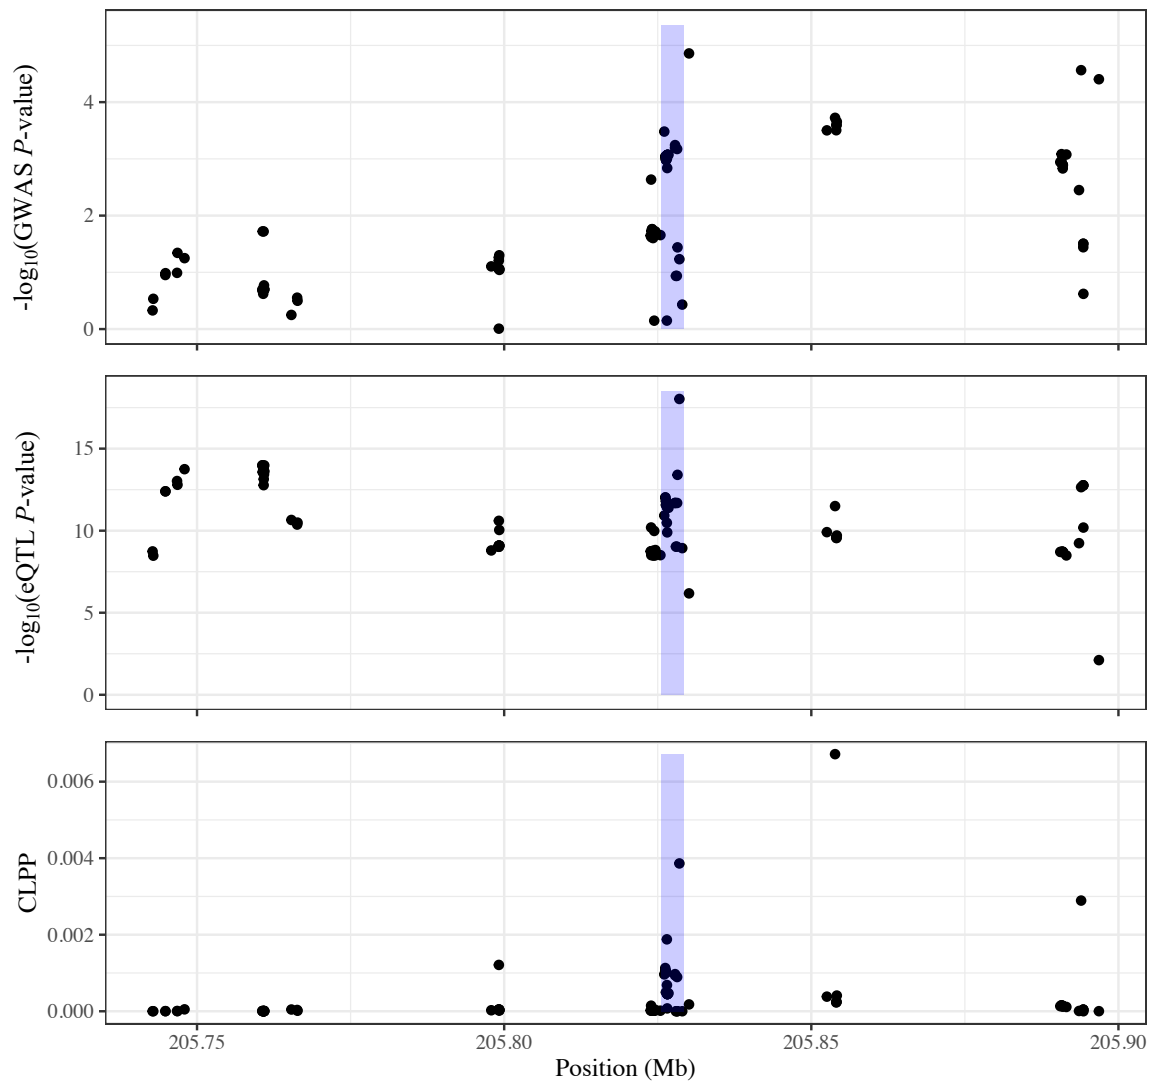

B

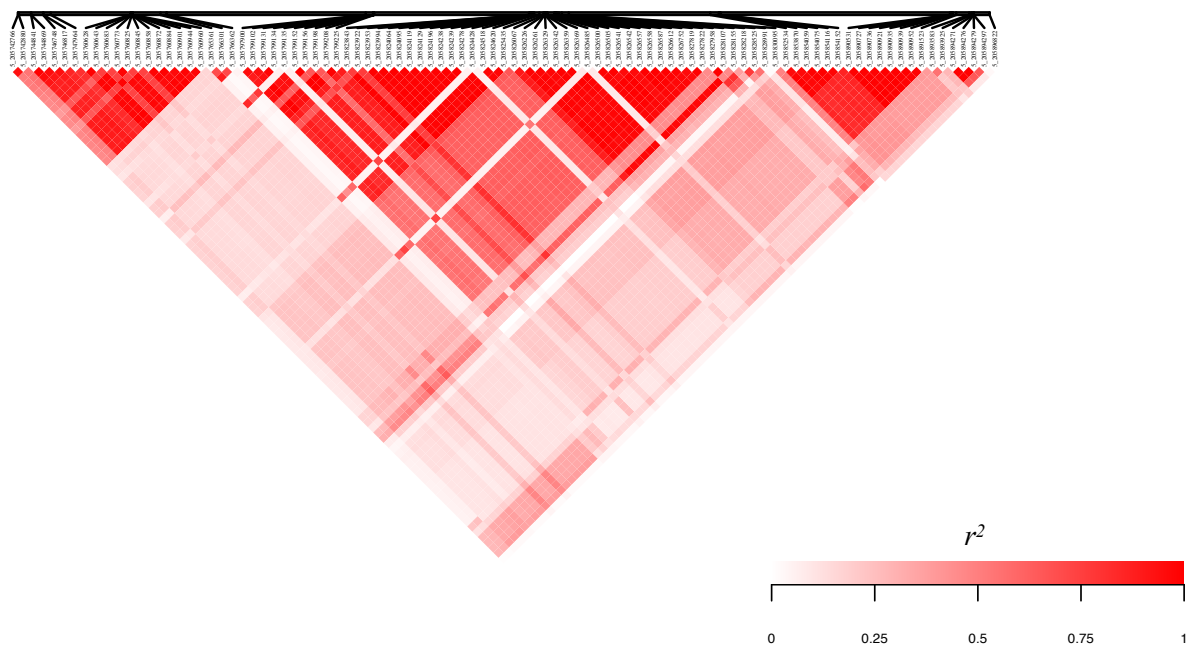

# GWAS, eQTL and eCAVIAR results at *vte5* for $\Sigma T T 3$

A

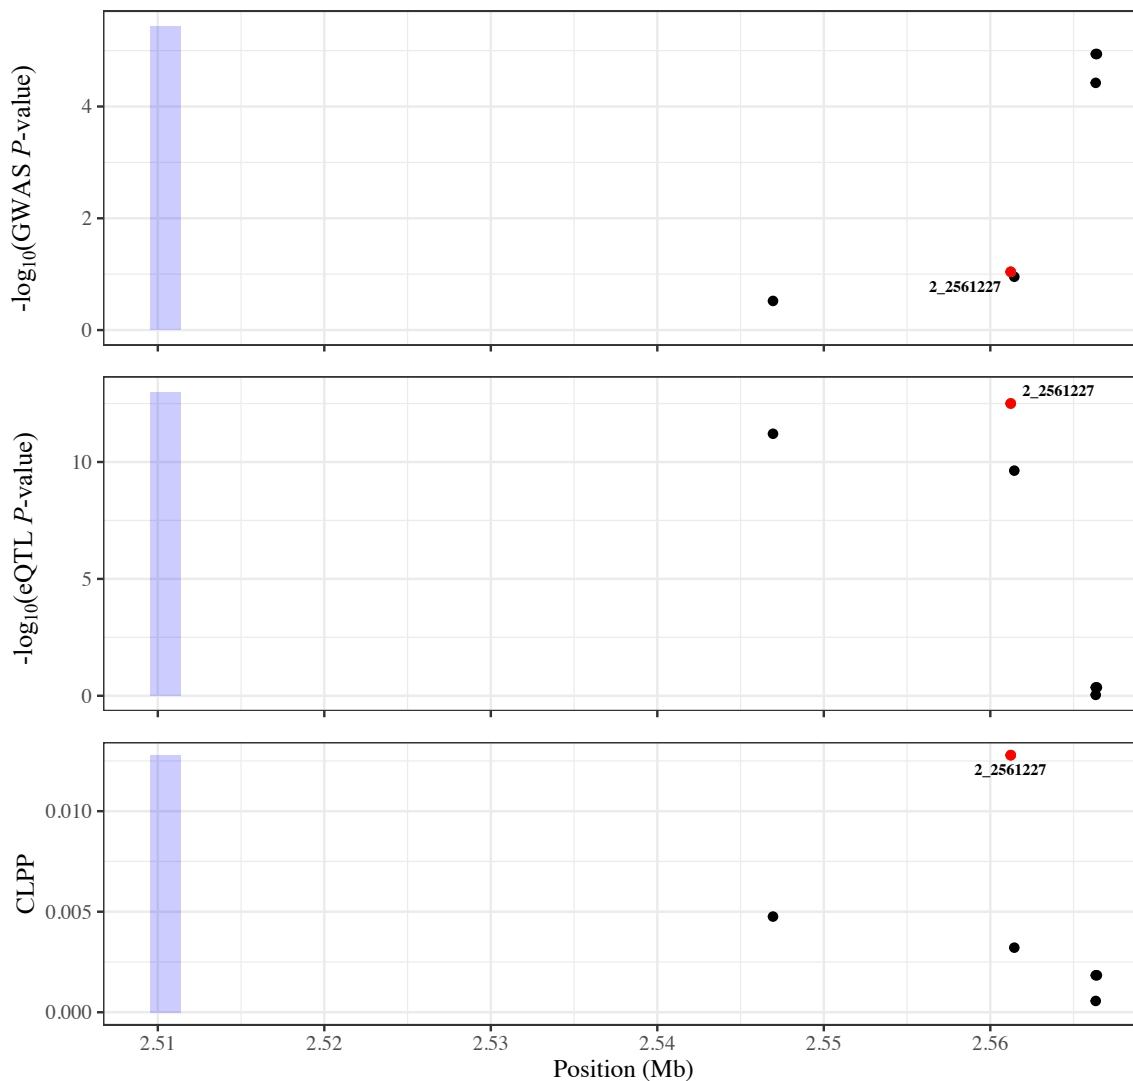

B

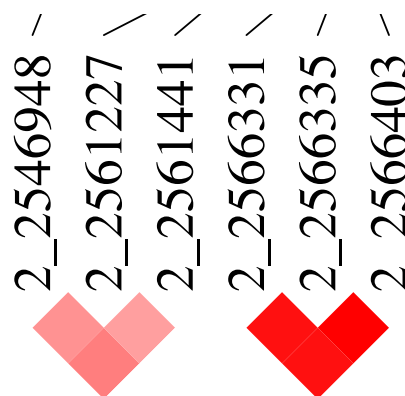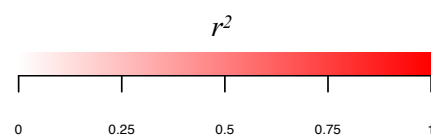

# GWAS, eQTL and eCAVIAR results at *vte7* for $\delta T$

A

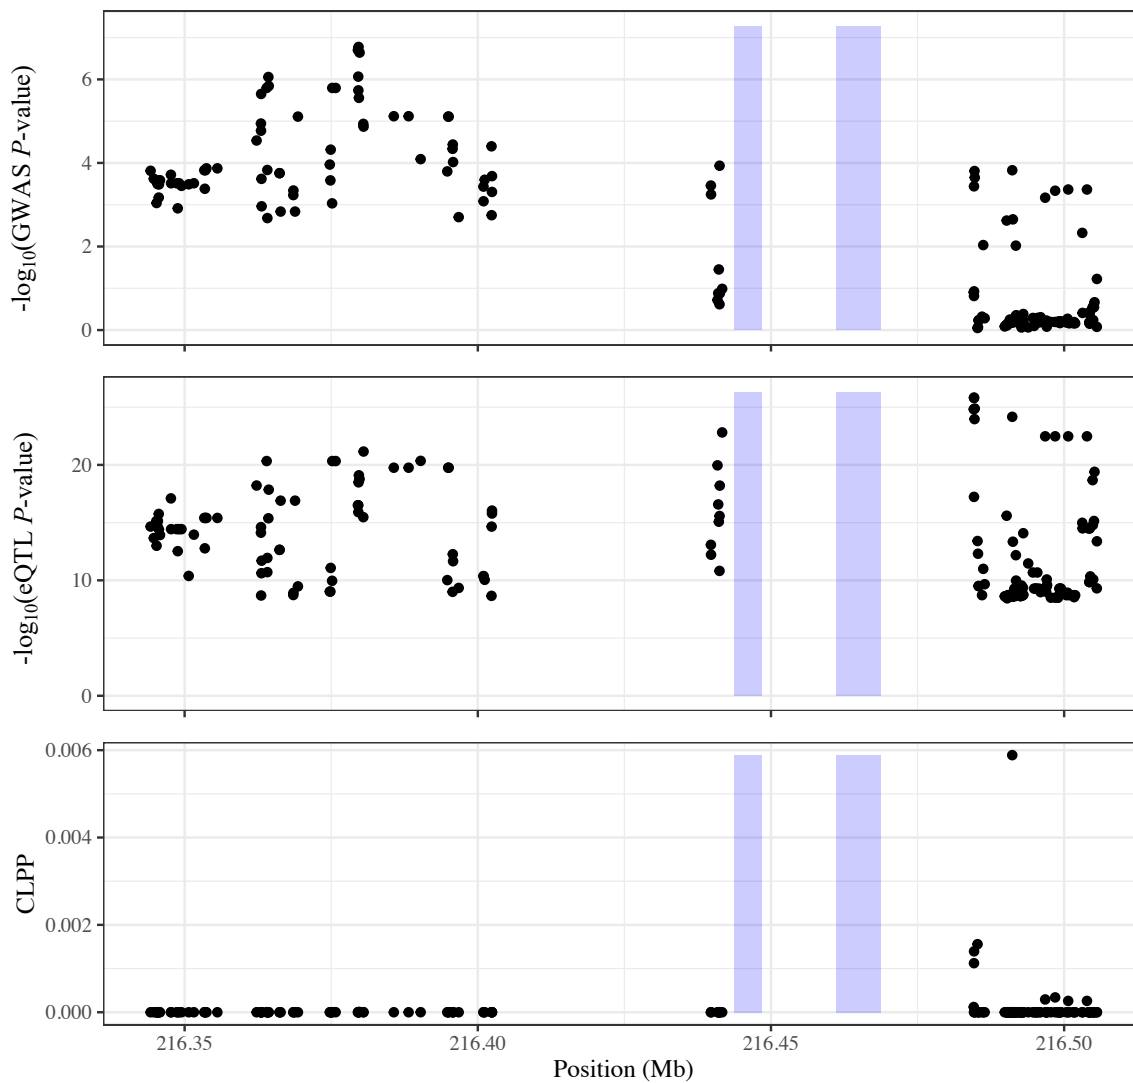

B

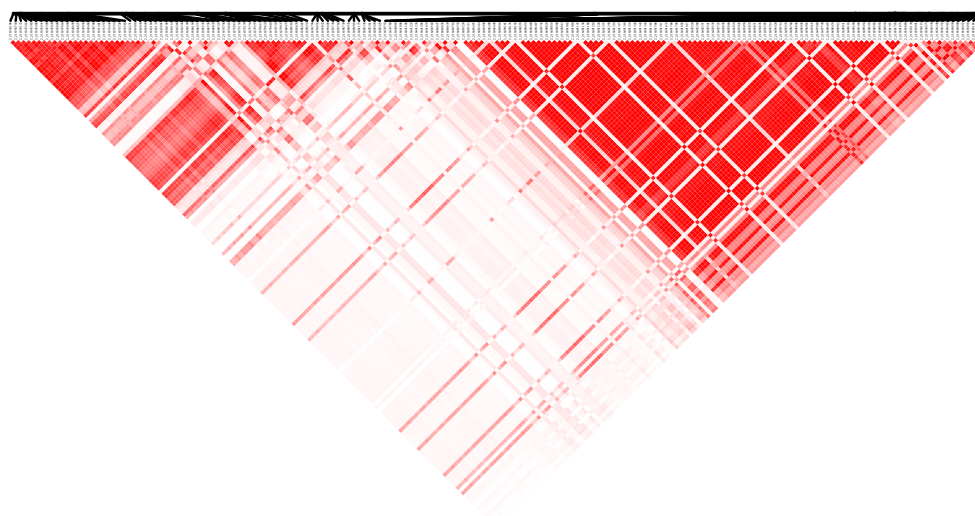

Supplement: Supplementary file 3 [file 1]
