# Supplementary material
Source: publisher figshare collection journal article supplement (https://gsajournals.figshare.com/articles/dataset/_/19918309)
Supplement: Supplementary file 4 [file 1]

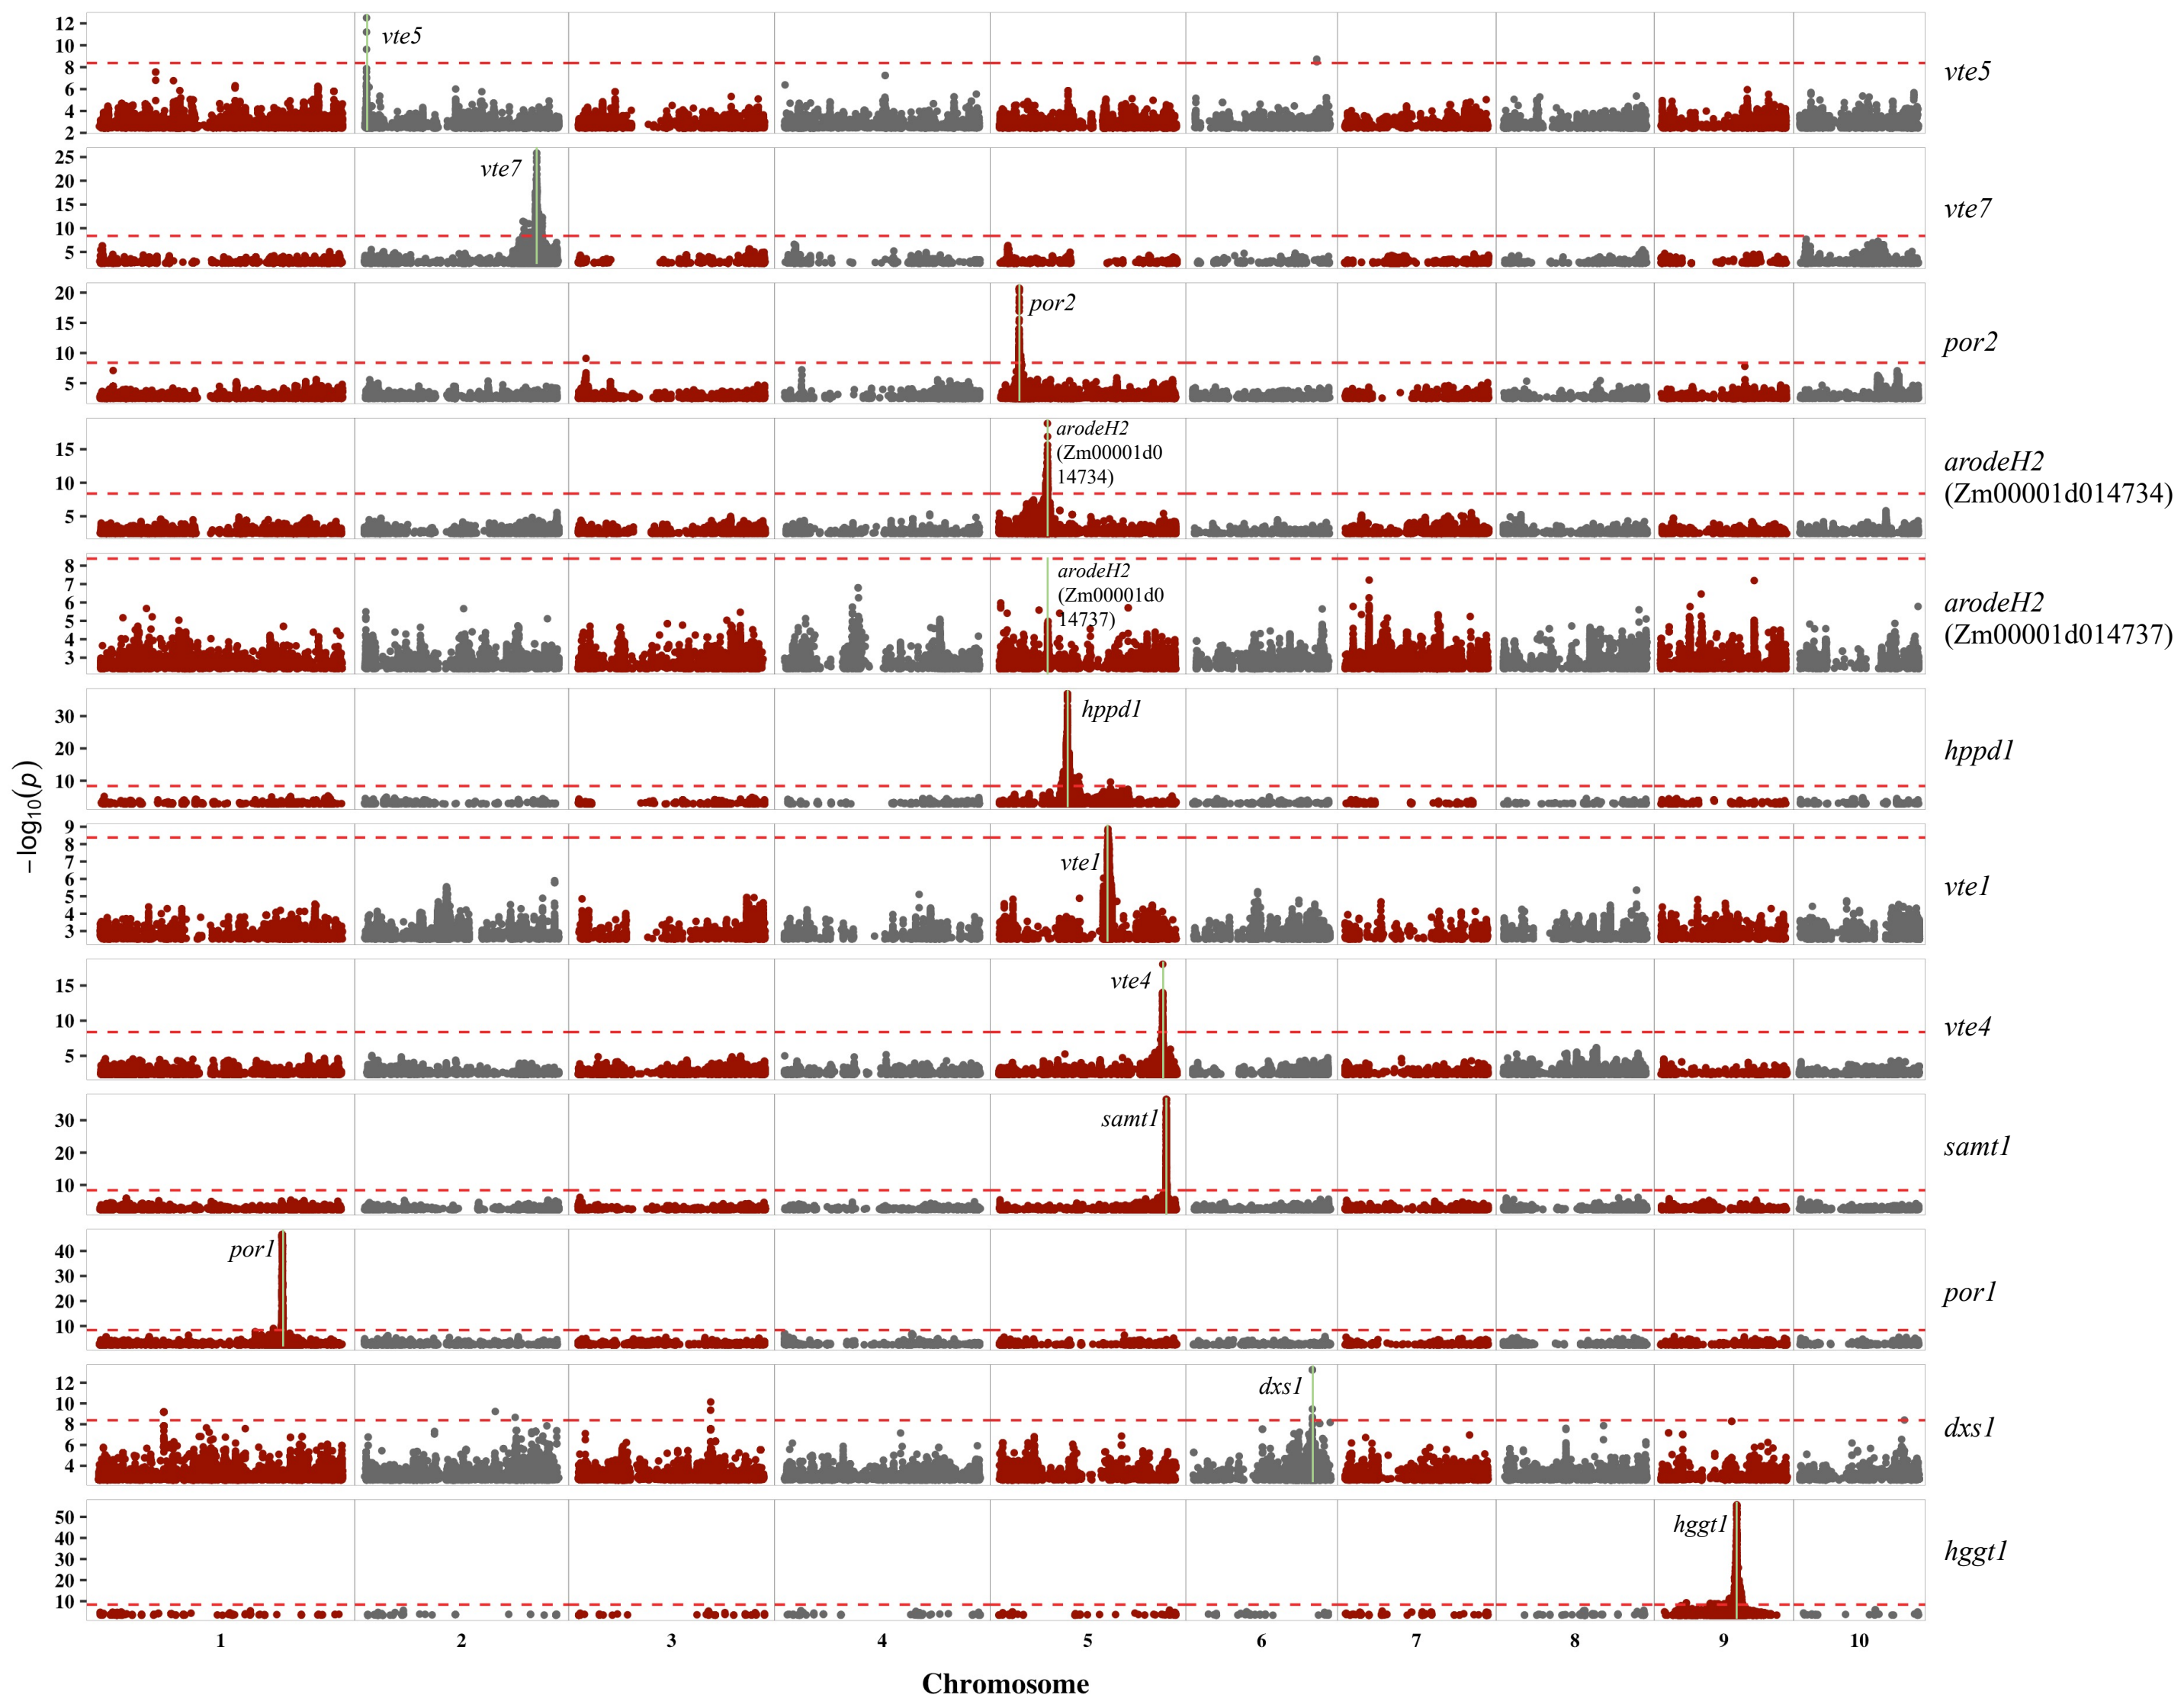

**Supplementary Figure S4.** Manhattan plots of expression quantitative trait loci (eQTL) mapping results of 12 candidate causal genes. Each point represents a SNP with its  $-\log_{10} P$ -value (y-axis) from a mixed linear model analysis plotted as a function of physical position (B73 RefGen\_v4) across the 10 chromosomes of maize (x-axis). The red horizontal dashed line indicates the significant threshold after Bonferroni correction ( $\alpha = 0.05$ ). The green vertical line indicates the genomic position of each candidate causal gene.
