# Supplementary material
Source: publisher figshare collection journal article supplement (https://gsajournals.figshare.com/articles/dataset/_/19918309)
Supplement: Supplementary file 6 [file 1]

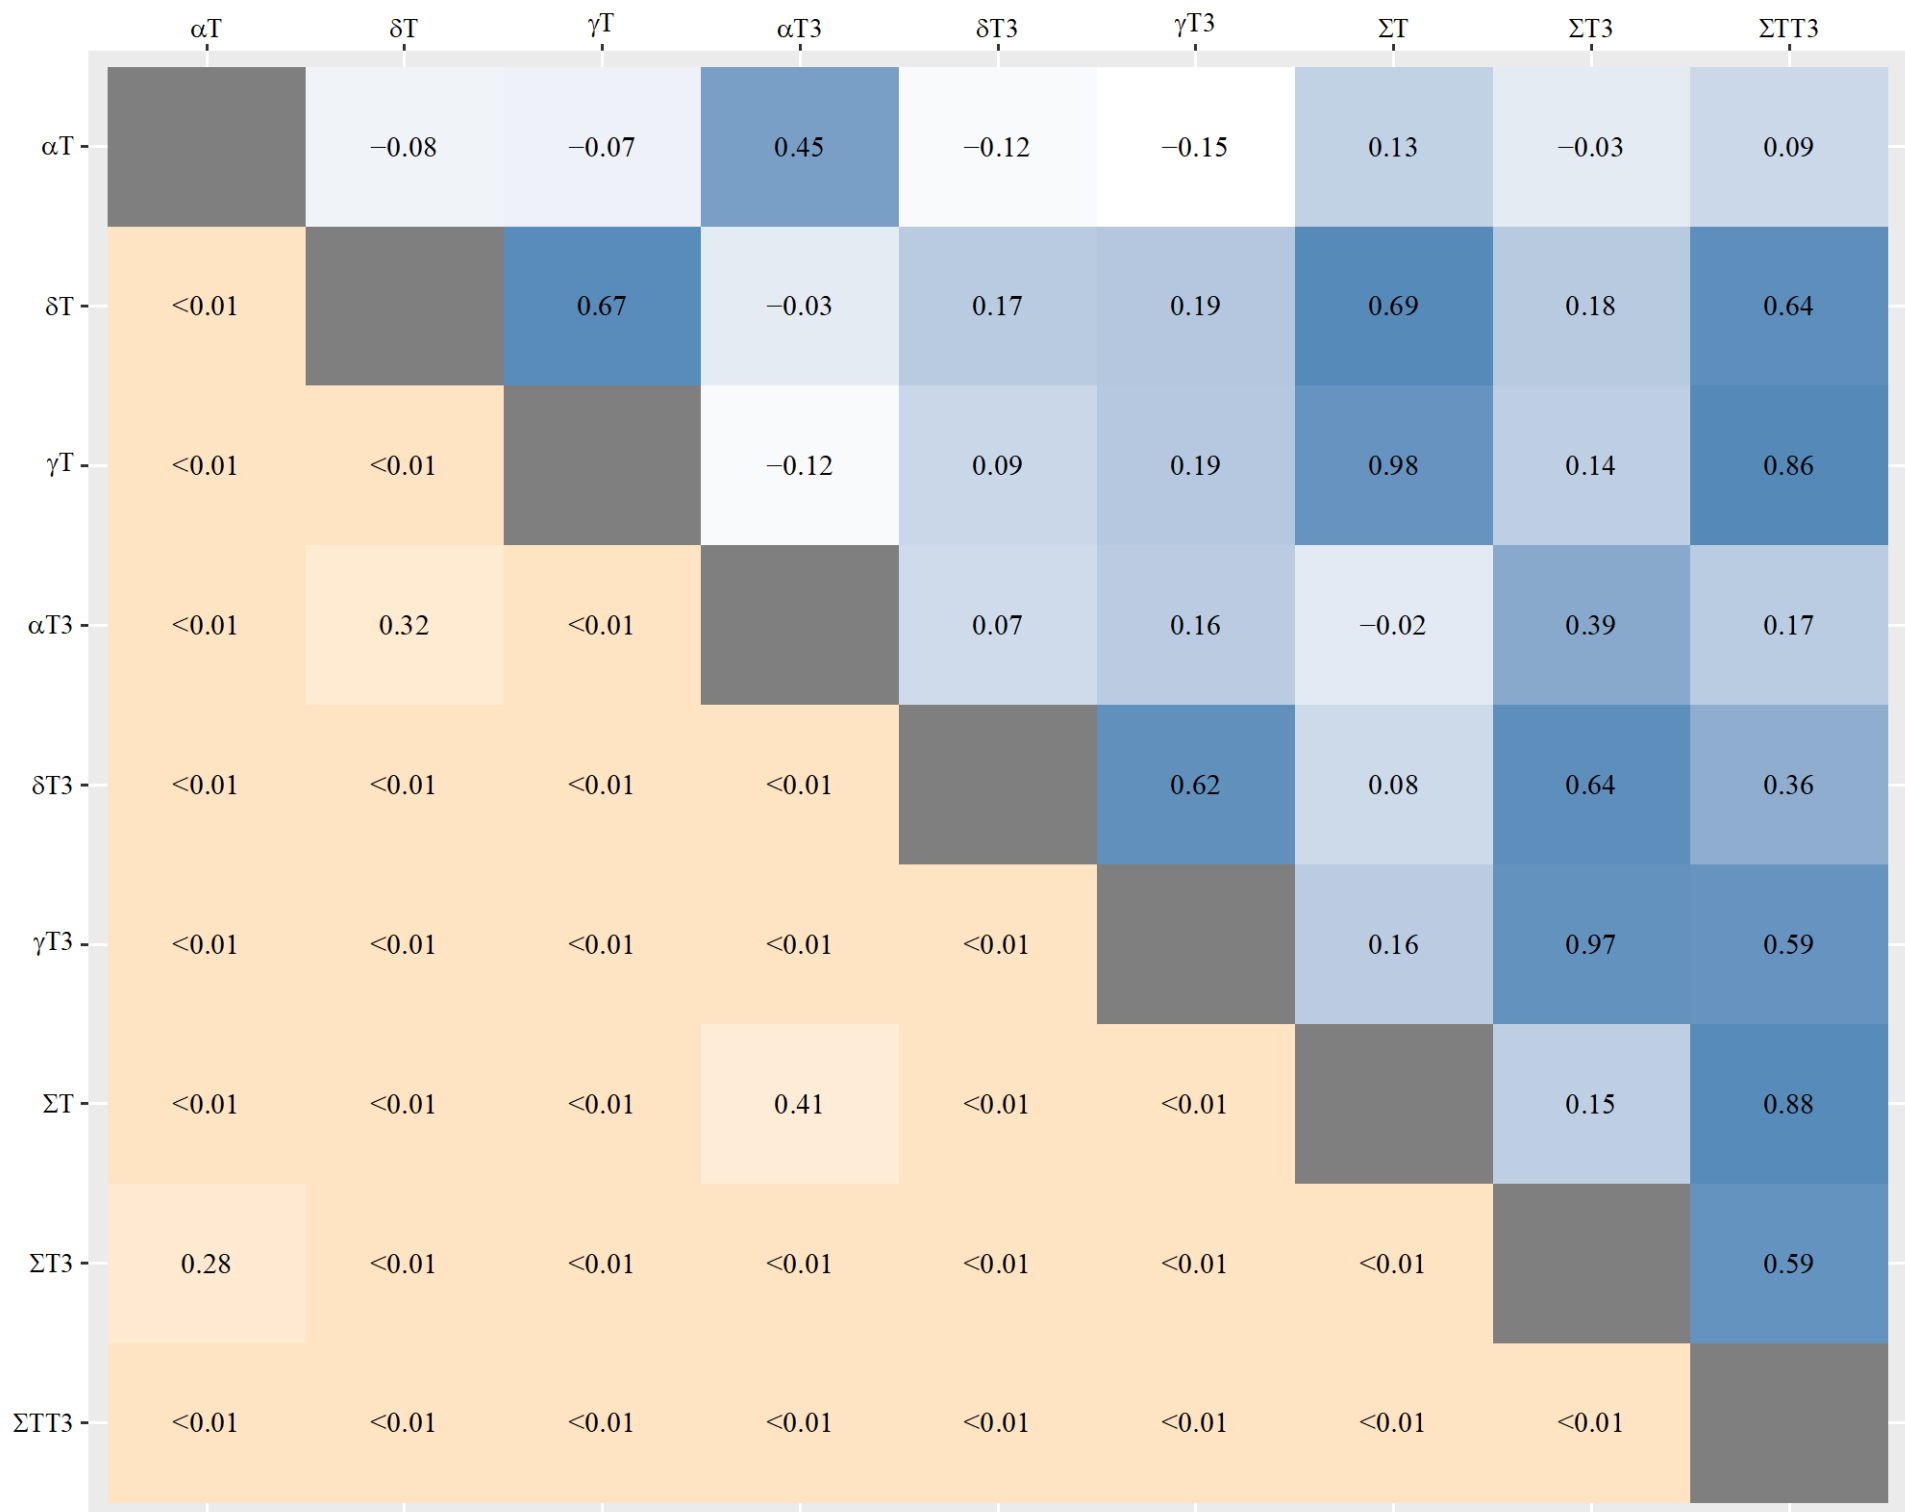

**Supplementary Figure S1.** Correlation matrix for untransformed BLUE values for nine tocochromanol grain phenotypes from 1,462 lines of the Ames panel. Pearson's correlation coefficients ( $r$ ) calculated with the function '*cor*' in R are presented in the upper triangle, whereas the corresponding  $P$ -values for the significance of correlations ( $\alpha = 0.05$ ) are displayed below the diagonal. The untransformed BLUE values were used to represent the true directionality of the relationship between phenotypes.
